# Supplementary material for: Transcriptomics supports local sensory regulation in the antenna of the kissing-bug Rhodnius prolixus
Source: PubMed Central journal article supplement (PMC6993403; doi:10.1186/s12864-020-6514-3), 2020-01-30
Supplement: 12864_2020_6514_MOESM1_ESM.pdf [file 12864_2020_6514_MOESM1_ESM.pdf]

**Table S1. Details of neuropeptide and neurohormone precursor genes.** Columns are: Gene – the gene and protein name we are assigning; VectorBase code – the official gene number in the RproC3 genome assembly, prefix is RPRC; Scaffold – the RproC3.3 genome assembly supercontig ID; AAs – number of encoded amino acids in the protein; Comments – comments on the OGS gene model and repairs performed in the genome assembly based on Blast searches against *de novo* antennal transcriptome assemblies. NTE: Amino terminal region; CTE: Carboxyl terminal region.

| Gene                                                  | Gene symbol      | VectoBase code | Scaffold                                                                     | Isoforms | AAs. | Hit against the antennal <i>de novo</i> assemblies | Comments                                                                                                                                |
|-------------------------------------------------------|------------------|----------------|------------------------------------------------------------------------------|----------|------|----------------------------------------------------|-----------------------------------------------------------------------------------------------------------------------------------------|
| <b>Adipokinetic hormone/corazonin-related peptide</b> | <i>ACP</i>       | -              | KQ035347                                                                     | -        | 126  | Yes                                                | New gene model created based on GenBank sequence KM975505 [1] and included in the edited genome GFF                                     |
| <b>Adipokinetic hormone</b>                           | <i>AKH</i>       | RPRC000416     | KQ034546                                                                     | A        | 71   | No                                                 | VectorBase prediction identical to GenBank sequence Acc. N° KM283242 [2]                                                                |
|                                                       |                  |                |                                                                              | B        | 70   | Yes                                                | New isoform identified based on antennal assemblies and included in the edited genome GFF                                               |
| <b>AstA</b>                                           | <i>AstA</i>      | -              | KQ034293                                                                     | -        | 203  | Yes                                                | New gene model created based on GenBank sequences Acc. N° GQ856315 and JN559385 [3] and included in the edited GFF                      |
| <b>Allatostatin B</b>                                 | <i>MIP</i>       | -              | KQ034158                                                                     | -        | 254  | Yes                                                | New gene model created based on Ons <i>et al.</i> 2011 and included in the edited genome GFF                                            |
| <b>Allatostatin CC</b>                                | <i>AstCC</i>     | RPRC000300     | KQ034374                                                                     | -        | 117  | Yes                                                | No changes in VectorBase prediction                                                                                                     |
| <b>Allatostatin CCC</b>                               | <i>AstCCC</i>    | -              | KQ034609                                                                     | -        | 100  | No                                                 | New gene model was created based on Ons <i>et. Al.</i> 2011 and included in the edited GFF. Previously, it was annotated as <i>AstC</i> |
| <b>Allatotropin</b>                                   | <i>AT</i>        | -              | KQ034313                                                                     | -        | 119  | Yes                                                | New gene model created was created based on GenBank sequence Acc. N° GQ162783 [3] and included in the edited genome GFF                 |
| <b>Bursicon alpha</b>                                 | <i>Burs-alfa</i> | RPRC000797     | KQ034200                                                                     | -        | 169  | Partial                                            | No changes in VectorBase prediction                                                                                                     |
| <b>Bursicon beta</b>                                  | <i>Burs-beta</i> | -              | KQ034059                                                                     | -        | 107  | No                                                 | Identified in this work using <i>T. castaneum</i> GenBank sequence Acc. N° NM_001114308.1 as query. Gene model included                 |
| <b>Diuretic hormone 31</b>                            | <i>Dh31</i>      | RPRC000977     | KQ034472 (5'UTR); KQ034594 (rest of the gene model) and KQ037272 (last exon) | A        | 146  | Yes                                                | Identical to GenBank sequences Acc. N° GQ856316 and AEA51300 [3]. Last 42 amino acids are located in the KQ037272 supercontig           |
|                                                       |                  |                |                                                                              | B        | 109  | No                                                 | Identical to GenBank sequences Acc. N° GQ856317 and AEA51301 [3]                                                                        |
|                                                       |                  |                |                                                                              | C        | 206  | Yes                                                | Identical to GenBank sequence Acc. N° HM030714.1 [4]                                                                                    |
| <b>Cardioacceleratory peptide (CAPA/CAP2b)</b>        | <i>CAPA</i>      | RPRC000639     | KQ034830                                                                     | A        | 158  | No                                                 | VectorBase prediction identical to GenBank sequence Acc. N° ABS17680 [5]. In VectorBase classified as non-translating CDS               |
|                                                       |                  | RPRC000563     | KQ034830                                                                     | B        | 158  | No                                                 | VectorBase prediction was identical to GenBank sequence Acc. N° ACH70295. In VectorBase classified as non-translating CDS               |

| Gene                                  | Gene symbol      | VectoBase code | Scaffold | Isoforms | Aas. | Hit against the antennal <i>de novo</i> assemblies | Comments                                                                                                                                                   |
|---------------------------------------|------------------|----------------|----------|----------|------|----------------------------------------------------|------------------------------------------------------------------------------------------------------------------------------------------------------------|
| <b>Crustacean cardiactive peptide</b> | <i>CCAP</i>      | RPRC000466     | KQ034330 | -        | 129  | Yes                                                | VectorBase prediction was identical to GenBank sequence Acc. N° GQ888668 [3]                                                                               |
| <b>CCHamide peptide</b>               | <i>CCHa</i>      | -              | KQ034137 | -        | 104  | Partial                                            | New gene model created based Ons <i>et al.</i> 2011 and included in the edited genome GFF                                                                  |
| <b>CNMamide peptide</b>               | <i>CNMa</i>      | RPRC010893     | KQ034609 | -        | 150  | No                                                 | No changes in VectorBase prediction                                                                                                                        |
| <b>Corazonin</b>                      | <i>CZ</i>        | -              | KQ034239 | -        |      | No                                                 | New gene model created based on Ons <i>et al.</i> 2011 and included in the edited genome GFF                                                               |
| <b>Diuretic hormone 44</b>            | <i>Dh44</i>      | RPRC000596     | KQ034102 | -        | 151  | Yes                                                | No changes in VectorBase prediction, which is identical to GenBank sequence Acc. N° HM153808 [6], annotated as corticotropin releasing factor-like protein |
| <b>Eclosion hormone</b>               | <i>EH</i>        | RPRC014242     | KQ034677 | -        | 241  | No                                                 | Partial sequence. Initial methionine is still missed                                                                                                       |
| <b>Elevenin-1</b>                     | <i>Elevin-1</i>  | RPRC003083     | KQ034317 | -        | 66   | No                                                 | No changes in VectorBase prediction                                                                                                                        |
| <b>Elevenin-2</b>                     | <i>Elevin-2</i>  | RPRC003084     | KQ034317 | -        | 87   | Yes                                                | No changes in VectorBase prediction                                                                                                                        |
| <b>Ecdysis triggering hormone</b>     | <i>ETH</i>       | RPRC014486     | KQ034462 | -        | 146  | Yes                                                | No changes in VectorBase prediction                                                                                                                        |
| <b>FLP</b>                            | <i>FMRFamida</i> | RPRC014988     | KQ035274 | -        | 273  | Partial                                            | No changes in VectorBase prediction                                                                                                                        |
| <b>Glycoprotein hormone alpha 2</b>   | <i>GPA2</i>      | RPRC007092     | KQ034094 | -        | 122  | Partial                                            | No changes in VectorBase prediction                                                                                                                        |
| <b>Glycoprotein hormone beta 5</b>    | <i>GPB5</i>      | -              | KQ034094 | -        | 156  | No                                                 | New gene model was created based on <i>C. lectularius</i> sequence XP_014244389.1. Methionine is missed.                                                   |
| <b>Kinin</b>                          |                  | RPRC000022     | KQ034106 | -        | 398  | Yes                                                | VectorBase prediction was identical to GenBank sequence Acc. N° BK007870 [7]                                                                               |
| <b>IDLSRF-like peptide</b>            | -                | RPRC000351     | KQ034112 | -        | 168  | Yes                                                | No changes in VectorBase prediction                                                                                                                        |
| <b>Insulin-like peptide</b>           | <i>Ilp</i>       | RPRC007020     | KQ034142 | -        | 126  | Yes                                                | VectorBase prediction was identical to GenBank sequence Acc. N° AMS34841.1 [8]                                                                             |
| <b>ITG-like</b>                       | -                | -              | KQ034255 | -        | 214  | Yes                                                | New gene model created based on Ons <i>et. al</i> 2011 and included in the edited genome GFF                                                               |
| <b>Ion transport peptide</b>          | <i>ITP</i>       | RPRC000519     | KQ034208 | A        | 111  | No                                                 | Annotated as sulfakinin (GenBank sequence Acc. N° GQ2539210). Last 33 amino acids are not in the genome                                                    |
|                                       |                  |                |          | B        | 117  | Yes                                                | VectorBase prediction was identical to GenBank sequence Acc. N° GU207866 [3]                                                                               |

| Gene                          | Gene symbol    | VectoBase code | Scaffold     | Isoforms | Aas. | Hit against the antennal <i>de novo</i> assemblies | Comments                                                                                                                            |
|-------------------------------|----------------|----------------|--------------|----------|------|----------------------------------------------------|-------------------------------------------------------------------------------------------------------------------------------------|
| Long Neuropeptide F           | <i>NPF</i>     | RPRC008107     | KQ034255     | No       | 105  | Yes                                                | VectorBase prediction extended in NTE region and initial methionine fixed according to GenBank sequence Acc. N° KT898124.1 [9]      |
| Myosuppressin                 | <i>Ms</i>      | RPRC000203     | KQ034384     | No       | 88   | Yes                                                | VectorBase prediction was identical to GenBank sequence Acc. N° GQ344501 [3]                                                        |
| Natalisin                     | <i>NTL</i>     | RPRC003680     | KQ034106     | -        | 196  | Partial                                            | No changes in VectorBase prediction                                                                                                 |
| Neuroparsin                   | <i>NP</i>      | RPRC002095     | Q034340      |          | 113  | Yes                                                | VectorBase prediction was identical to GenBank sequence Acc. N° GU207864 [3]                                                        |
| Neuropeptide like precursor 1 | <i>NPLP1</i>   | RPRC011668     | KQ034238     | -        | 454  | Yes                                                | VectorBase prediction was identical to GenBank sequence Acc. N° GU207865 [3]                                                        |
| NVP-like                      | <i>PH2</i>     | RPRC003052     | ACPB03040762 | -        | 299  | Yes                                                | VectorBase prediction was shorter in NTE and CTE regions. Impossible to fix the genome model due to problem in the genome assembly. |
| Orcokinin                     | <i>OK</i>      | RPRC014678     | KQ034149     | A        | 165  | Yes                                                | One exon added in NTE region of VectorBase prediction based on GenBank sequence Acc. N° FJ167860                                    |
|                               |                |                |              | B        | 392  | Yes                                                | Only first 52 amino acids present in the genome. Sequence identical to GenBank sequence Acc. N° FJ761320 [10]                       |
|                               |                |                |              | C        | 422  | No                                                 | Same problem as mentioned for isoform B. Sequence identical to GenBank sequence Acc. N° KF179047                                    |
| Pigment dispersing factor     | <i>PDF</i>     | -              | KQ034061     | -        | 48   | Yes                                                | New gene model created based on <i>Ons et al.</i> 2011 and included in the edited genome GFF                                        |
| Proctolin                     | <i>Proc</i>    | RPRC000390     | KQ034188     | -        | 97   | No                                                 | VectorBase prediction was identical to GenBank sequence Acc. N° JN543225 [11]                                                       |
| Pyrokinin                     | <i>PK-PBAN</i> | -              | KQ034521     | -        | 122  | Yes                                                | New gene model created based on GenBank sequence GU230851 and included in the edited genome GFF                                     |
| RYamide                       | <i>RYa</i>     | RPRC000461     | KQ035177     | -        | 107  | Yes                                                | Initial methionine of VectorBase model was fixed according to antennal assemblies                                                   |
| Short Neuropeptide F          | <i>sNPF</i>    | -              | KQ034092     | -        | 92   | Yes                                                | New gene model created based on GenBank sequence Acc. N° GQ452380 [3] and included in the edited genome GFF                         |
| SIFamide                      | <i>SIFa</i>    | -              | KQ035590     | -        | 74   | Yes                                                | New gene model created based on GenBank sequence Acc. N° GQ253922 [3] and included in the edited genome GFF                         |
| Sulphakinin                   | <i>SK</i>      | -              | KQ034228     | -        | 92   | Yes                                                | New gene model created based on GenBank sequence Acc. N° GQ162784 [3] and included in the edited genome GFF                         |
| Tachykinin                    | <i>TK</i>      | RPRC000843     | ACPB03026326 | -        | 215  | Yes                                                | VectorBase prediction was identical to GenBank sequence Acc. N° GQ162785 [3]                                                        |

1. Zandawala M, Haddad AS, Hamoudi Z, Orchard I: **Identification and characterization of the adipokinetic hormone/corazonin-related peptide signaling system in *Rhodnius prolixus***. *The FEBS Journal* 2015, **282**(18):3603-3617.
2. Zandawala M, Hamoudi Z, Lange AB, Orchard I: **Adipokinetic hormone signalling system in the C hagas disease vector, *Rhodnius prolixus***. *Insect Mol Biol* 2015, **24**(2):264-276.
3. Ons S, Sterkel M, Diambra L, Urlaub H, Rivera-Pomar R: **Neuropeptide precursor gene discovery in the Chagas disease vector *Rhodnius prolixus***. *Insect Mol Biol* 2011, **20**(1):29-44.
4. Zandawala M, Paluzzi J-P, Orchard I: **Isolation and characterization of the cDNA encoding DH31 in the kissing bug, *Rhodnius prolixus***. *Mol Cell Endocrinol* 2011, **331**(1):79-88.
5. Paluzzi J-P, Russell WK, Nachman RJ, Orchard I: **Isolation, cloning, and expression mapping of a gene encoding an antidiuretic hormone and other CAPA-related peptides in the disease vector, *Rhodnius prolixus***. *Endocrinology* 2008, **149**(9):4638-4646.
6. Te Brugge V, Paluzzi J-P, Schooley DA, Orchard I: **Identification of the elusive peptidergic diuretic hormone in the blood-feeding bug *Rhodnius prolixus*: a CRF-related peptide**. *J Exp Biol* 2011, **214**(3):371-381.
7. Te Brugge V, Paluzzi J-P, Neupert S, Nachman RJ, Orchard I: **Identification of kinin-related peptides in the disease vector, *Rhodnius prolixus***. *Peptides* 2011, **32**(3):469-474.
8. Defferrari MS, Orchard I, Lange AB: **Identification of the first insulin-like peptide in the disease vector *Rhodnius prolixus*: involvement in metabolic homeostasis of lipids and carbohydrates**. *Insect Biochem Mol Biol* 2016, **70**:148-159.
9. Sedra L, Lange AB: **Cloning and expression of long neuropeptide F and the role of FMRFamide-like peptides in regulating egg production in the Chagas vector, *Rhodnius prolixus***. *Peptides* 2016, **82**:1-11.
10. Sterkel M, Oliveira PL, Urlaub H, Hernandez-Martinez S, Rivera-Pomar R, Ons S: **OKB, a novel family of brain-gut neuropeptides from insects**. *Insect Biochem Mol Biol* 2012, **42**(7):466-473.
11. Orchard I, Lee DH, Da Silva R, Lange AB: **The proctolin gene and biological effects of proctolin in the blood-feeding bug, *Rhodnius prolixus***. *Front Endocrinol* 2011, **2**:59.
