# Supplementary material for: Transcriptomics supports local sensory regulation in the antenna of the kissing-bug Rhodnius prolixus
Source: PubMed Central journal article supplement (PMC6993403; doi:10.1186/s12864-020-6514-3), 2020-01-30
Supplement: 12864_2020_6514_MOESM2_ESM.pdf [file 12864_2020_6514_MOESM2_ESM.pdf]

**Table S2. Details of G protein coupled receptor genes.** Columns are: Gene – the gene and protein name we are assigning; VectorBase code – the official gene number in the RproC3 genome assembly, prefix is RPRC; Scaffold – the RproC3 genome assembly supercontig ID; AAs – number of encoded amino acids in the protein; Comments – comments on the OGS gene model and repairs performed in the genome assembly (available on VectorBase) based on Blast searches against *de novo* antennal transcriptome assemblies. NTE: Amino terminal region; CTE: Carboxyl terminal region.

| Gene                                                            | Ligand        | VectorBase code     | Scaffold              | AAs.     | Hit against the antennal <i>de novo</i> assemblies | Comments                                                                                                         |
|-----------------------------------------------------------------|---------------|---------------------|-----------------------|----------|----------------------------------------------------|------------------------------------------------------------------------------------------------------------------|
| <b>BIOGENIC AMINE G PROTEIN RECEPTORS</b>                       |               |                     |                       |          |                                                    |                                                                                                                  |
| <b>Muscarinic Acetylcholine receptor A</b>                      | Acetylcholine | -                   | KQ034078              | 555      | No                                                 | VectorBase predictions (RPRC001750, 001751 and 007566) fused. The last prediction located in the opposite strand |
| <b>Muscarinic Acetylcholine receptor B</b>                      |               | RPRC010907          | KQ034218              | 879      | Yes                                                | The first exon extended. Initial methionine is still missed                                                      |
| <b>Muscarinic Acetylcholine receptor C</b>                      |               | RPRC010656          | KQ034118              | 315      | Yes                                                | The NTE extended. Initial methionine fixed                                                                       |
| <b>Dopamine 1-like receptor 1</b>                               | Dopamine      | RPRC014093          | KQ034515              | 395      | Partial                                            | New exon added in NTE region. Initial methionine is still missed                                                 |
| <b>Dopamine 1-like receptor 2</b>                               |               | RPRC013708          | KQ034114              | 426      | Partial                                            | NTE region extended. Initial methionine is still missed                                                          |
| <b>Dopamine 2-like receptor</b>                                 |               | RPRC011175          | KQ034171              | 99       | No                                                 | Partial sequence. The last two exons eliminated.                                                                 |
| <b>Dopamine Ecdysone receptor</b>                               |               | RPRC014528          | KQ034056              | 354      | Partial                                            | The initial methionine is missed.<br>No changes in VectorBase prediction                                         |
| <b>Serotonin (5-HT) receptor 1a</b>                             | Serotonin     | RPRC010931          | KQ034080              | 441      | Partial                                            | The NTE extended. The initial methionine is still missed                                                         |
| <b>5-HT receptor 1b</b>                                         |               | RPRC008923          | KQ036077 and KQ034329 | 578      | Yes                                                | The first 176 amino acids are located in KQ036077. VectorBase prediction RPRC008923 edited                       |
| <b>5-HT receptor 2a</b>                                         |               | -                   | KQ034057              | 373      | Partial                                            | VectorBase predictions RPRC005858 and RPRC001892 fused. Initial methionine is still missed                       |
| <b>5-HT receptor 2b</b>                                         |               | RPRC000473          | KQ034057              | 703      | Yes                                                | Identical to GenBank sequence Acc. N° AKQ13312 [1]                                                               |
| <b>5-HT receptor 7</b>                                          |               | -                   | KQ034099              | 423      | Partial                                            | VectorBase predictions RPRC007788 and RPRC001792 fused. Initial methionine is missed                             |
| <b>Octopamine (Oct) beta receptor 1</b>                         | Octopamine    | -                   | KQ034268              | 426      | Partial                                            | VectorBase predictions RPRC001507 and RPRC005349 fused. Initial methionine is still missed                       |
| <b>Oct beta receptor 2</b>                                      |               | RPRC011545          | KQ034319              | 447      | Yes                                                | Initial methionine fixed                                                                                         |
| <b>Oct beta receptor 3</b>                                      |               | -                   | KQ034653              | 375      | Partial                                            | VectorBase predictions RPRC014610 and RPRC001054 fused and edited. Initial methionine is still missed            |
| <b><math>\alpha</math>2-adrenergic-like octopamine receptor</b> |               | RPRC015456          | KQ034169              | 330      | Partial                                            | Initial methionine is missed.<br>No changes on VectorBase prediction                                             |
| <b>Oct receptor in mushroom bodies (Oamb) -like</b>             |               | RPRC001341          | KQ034231              | 417      | Partial                                            | No changes in VectorBase prediction. Partial sequence                                                            |
| <b>Oct/Tyramine</b>                                             |               | Octopamine/Tyramine | RPRC008712            | KQ034100 | 455                                                | Yes                                                                                                              |
| <b>Orphan receptor 1</b>                                        | Unknown       | RPRC004409          | KQ034373              | 235      | Partial                                            | No changes in VectorBase prediction                                                                              |
| <b>Orphan receptor 2</b>                                        | Unknown       | RPRC002007-8        | KQ034058              | 201      | No                                                 | Two VectorBase predictions fused                                                                                 |

| Gene                                              | Ligand                        | VectorBase code | Scaffold                        | Aas. | Hit against the antennal <i>de novo</i> assemblies | Comments                                                                                |
|---------------------------------------------------|-------------------------------|-----------------|---------------------------------|------|----------------------------------------------------|-----------------------------------------------------------------------------------------|
| <b>NEUROPEPTIDE RECEPTORS FAMILY A</b>            |                               |                 |                                 |      |                                                    |                                                                                         |
| <b>ACP receptor isoform A</b>                     |                               | -               |                                 | 295  | No                                                 | New gene model created based GenBank sequence Acc. N° KM975506 [2]                      |
| <b>ACP receptor isoform B</b>                     | AKH Corazonin related peptide | -               | KQ034104, KQ035406 and KQ034241 | 451  | No                                                 | New gene model created based on GenBank sequence Acc. N° KM975507 [2]                   |
| <b>ACP receptor isoform C</b>                     |                               | -               |                                 | 430  | No                                                 | New gene model created based on GenBank sequence Acc. N° KM975508 [2]                   |
| <b>AKH receptor</b>                               | Adipokinetic hormone          | -               | KQ034132                        | 353  | Yes                                                | New gene model created based on GenBank sequence Acc. N° AIJ49751 [3]                   |
| <b>Allatostatin A receptor</b>                    | Allatostatin A                | RPRC004708      | KQ034532                        | 404  | No                                                 | VectorBase prediction updated according to GenBank sequence Acc. N° KM283241 [4]        |
| <b>Allatostatin C receptor</b>                    | Allatostatin C                | RPRC013486      | KQ034333                        | 419  | Yes                                                | The initial methionine fixed according antennal transcriptome                           |
| <b>Allatotropin receptor</b>                      | Allatotropin                  | -               | KQ034097                        | 306  | Partial                                            | New gene model created, which is partially in the GenBank sequence Acc. N° KF740716 [5] |
| <b>Bursicon receptor</b>                          | Bursicon                      | RPRC001663      | KQ034113                        | 688  | Yes                                                | No changes in VectorBase prediction                                                     |
| <b>CAPA receptor isoform A</b>                    | CAPA peptide                  | RPRC000516      | KQ034065                        | 385  | No                                                 | Identical to GenBank sequence Acc. N° ADG27752 [6]                                      |
| <b>CAPA receptor isoform B</b>                    | CAPA peptide                  | -               | KQ034065                        | 354  | No                                                 | New gene model created based on GenBank sequence Acc. N° ADG27753 [6]                   |
| <b>CCH amide receptor 1</b>                       | CCHamide peptide              | RPRC007766      | KQ034099                        | 331  | No                                                 | No changes in VectorBase prediction                                                     |
| <b>CCH amide receptor 2</b>                       |                               | RPRC000608      | KQ034099                        | 373  | No                                                 | No changes in VectorBase prediction                                                     |
| <b>CNM amide receptor</b>                         | CNMamide peptide              | RPRC001428      | KQ034058                        | 140  | Partial                                            | Partial sequence. No changes in VectorBase prediction                                   |
| <b>Crustacean cardioactive peptide receptor 1</b> | CCAP                          | RPRC001248      | KQ034056                        | 374  | Yes                                                | Identical to GenBank sequence Acc. N° KC004225 [7]                                      |
| <b>Crustacean cardioactive peptide receptor 2</b> |                               | -               | KQ034561 and KQ034059           | 188  | No                                                 | VectorBase predictions RPRC000969 and RPRC012063 fused. Partial sequence                |
| <b>Corazonin receptor</b>                         | Corazonin                     | RPRC000523      | KQ034084                        | 383  | No                                                 | No changes in VectorBase prediction                                                     |
| <b>Corazonin receptor alfa isoform</b>            |                               | -               | KQ034084                        | 441  | Yes                                                | New gene model created based on alfa isoform GenBank sequence Acc. N° AND99324 [8]      |
| <b>Corazonin receptor beta isoform</b>            |                               | -               | KQ034084                        | 419  | No                                                 | New gene model created based on beta isoform GenBank sequence Acc. N° AND99325 [8]      |

| Gene                                            | Ligand                     | VectorBase code        | Scaffold                        | Aas. | Hit against the antennal <i>de novo</i> assemblies | Comments                                                                                                                                                                                           |
|-------------------------------------------------|----------------------------|------------------------|---------------------------------|------|----------------------------------------------------|----------------------------------------------------------------------------------------------------------------------------------------------------------------------------------------------------|
| <b>Ecdysis triggering hormone receptor</b>      | Ecdysis triggering hormone | RPRC000848, RPRC008652 | KQ034066, KQ034378 and KQ034714 | 424  | Yes                                                | Two VectorBase predictions were fused and edited.                                                                                                                                                  |
| <b>FMRF receptor</b>                            | FaLP                       | RPRC001551             | KQ034140                        | 410  | Yes                                                | No changes in VectorBase prediction                                                                                                                                                                |
| <b>FaLPamide/Proctolin receptor</b>             | FaLP/Proctolin             | RPRC015267             | KQ034074                        | 345  | Partial                                            | No changes in VectorBase prediction. Partial sequence, initial methionine is still missed                                                                                                          |
| <b>GPA2/GPB2 receptor</b>                       | GPA2/GPB5                  | RPRC007243             | KQ034109                        | 591  | Partial                                            | CTE was extended until STOP codon. Partial sequence, initial methionine is still missed                                                                                                            |
| <b>Ion Transport 1 receptor</b>                 | -                          | RPRC004793             | KQ034083                        | 611  | Yes                                                | No changes in VectorBase prediction                                                                                                                                                                |
| <b>Kinin receptor 1</b>                         | Kinin                      | RPRC000494             | KQ034056                        | 414  | Yes                                                | Two first exons and last exon eliminated from VectorBase prediction according to our antennal transcriptome                                                                                        |
| <b>Kinin receptor 2</b>                         |                            | -                      | KQ034861 and KQ034100           | 366  | Yes                                                | Two predictions RPRC008570 and RPRC008649 fused and lited. Described as orphan by S Ons, A Lavore, M Sterkel, JP Vullff, I Sierra, JM Barnetche, MH Rodriguez and R Rivera-Pomar [9] as RPRC008570 |
| <b>Long neuropeptide F receptor 1</b>           | Neuropeptide F             | -                      | KQ034119                        | 390  | Partial                                            | New gene model created based on [10]                                                                                                                                                               |
| <b>Long neuropeptide F receptor 2</b>           |                            | RPRC008894             | KQ034459                        | 180  | Partial                                            | No changes in VectorBase prediction. Partial sequence, initial methionine is still missed                                                                                                          |
| <b>Myoinhibitory peptide receptor isoform A</b> | Allatostatin B             | RPRC000605             | KQ034129                        | 420  | Partial                                            | VectorBase prediction was identical to GenBank sequence Acc. N° KF958188 [11]                                                                                                                      |
| <b>Myoinhibitory peptide receptor isoform B</b> |                            | -                      | KQ034129                        | 324  | No                                                 | No VectorBase prediction                                                                                                                                                                           |
| <b>Myosuppressin receptor</b>                   | Myosuppressin              | -                      | KQ034057                        | 368  | No                                                 | New gene model created based on GenBank sequence Acc. N° AGT02812 [12]                                                                                                                             |
| <b>Natalisin receptor</b>                       | Natalisin                  | RPRC001687             | KQ034139                        | 351  | Yes                                                | VectorBase prediction extended in NTE region according to antennal transcriptome                                                                                                                   |
| <b>Pyrokinin 1 receptor</b>                     | PBAN                       | RPRC008528             | KQ034938                        | 208  | No                                                 | No changes in VectorBase prediction. Partial sequence.                                                                                                                                             |
| <b>Pyrokinin 2 receptor isoform A</b>           |                            | -                      | KQ034161                        | 345  | Partial                                            | New gene model created based on GenBank sequence Acc. N° AFO73269 [13]. Sequence partially represented at RPRC005110                                                                               |
| <b>Pyrokinin 2 receptor isoform B</b>           |                            | -                      | KQ034161                        | 444  | Partial                                            | New gene model created based on GenBank sequence Acc. N° AFO73270 [13]. Sequence partially represented at RPRC005110                                                                               |
| <b>Pyrokinin 2 receptor isoform C</b>           |                            | -                      | KQ034161                        | 414  | Partial                                            | New gene model created based on GenBank sequence Acc. N° AFO73271 [13]. Partially represented RPRC005110                                                                                           |

| Gene                                                                           | Ligand               | VectorBase code | Scaffold                        | Aas. | Hit against the antennal <i>de novo</i> assemblies | Comments                                                                                                                               |
|--------------------------------------------------------------------------------|----------------------|-----------------|---------------------------------|------|----------------------------------------------------|----------------------------------------------------------------------------------------------------------------------------------------|
| <b>Pyroglutamylate RFamide peptide receptor</b>                                | Rfamide peptides     | -               | KQ034100                        | 395  | Yes                                                | New gene model created. First 100 amino acids in RPRC014460                                                                            |
| <b>RYamide receptor</b>                                                        | Ryamide              | -               | KQ034249 and KQ034213           | 360  | Partial                                            | New gene model created based on Ons [13]. First 133 amino acids in KQ034249. Problem between 3 <sup>rd</sup> and 4 <sup>th</sup> exons |
| <b>Short neuropeptide F receptor</b>                                           | Short neuropeptide F | -               | KQ034095 and KQ035872           | 448  | Yes                                                | Three VectorBase predictions (RPRC002266, 002268 and 002269) fused                                                                     |
| <b>Sulfakinin receptor 1</b>                                                   | Sulfakinin           | -               | KQ035199, KQ035392 and KQ034565 | 320  | No                                                 | RPRC012816 (KQ034095) and RPRC003273 (KQ035392) represented different parts of gene model                                              |
| <b>Sulfakinin receptor 2</b>                                                   |                      | RPRC012816      | KQ034565                        | 138  | No                                                 | No changes in VectorBase prediction. Partial sequence.                                                                                 |
| <b>SIFamide receptor</b>                                                       | SIFamide             | RPRC000835      | ACPB03024746                    | 451  | Yes                                                | The first part of VectorBase prediction eliminated. Only the last 264 amino acids were present in the genome                           |
| <b>Tachykinin 86C receptor-like</b>                                            | Tachykinin           | RPRC008022      | kQ035269                        | 309  | Yes                                                | No changes in VectorBase prediction. Identified as ITP receptor by S Ons [14]                                                          |
| <b>Tachykinin 99D receptor-like</b>                                            |                      | -               | KQ034874 and KQ034432           | 378  | Yes                                                | VectorBase predictions RPRC003160 and RPRC000651 were fused                                                                            |
| <b>Orphan receptor 3</b>                                                       | -                    | RPRC014721      | KQ034261                        | 962  | Partial                                            | No changes in VectorBase prediction. Initial methionine is missed                                                                      |
| <b>Orphan receptor 4</b>                                                       | -                    | RPRC004128      | KQ035493                        | 381  | No                                                 | No changes in VectorBase prediction. Initial methionine is missed                                                                      |
| <b>Orphan receptor 5</b>                                                       | -                    | RPRC008364      | KQ034143                        | 117  | No                                                 | No changes in VectorBase prediction. Partial sequence                                                                                  |
| <b>NEUROPEPTIDE RECEPTORS FAMILY B</b>                                         |                      |                 |                                 |      |                                                    |                                                                                                                                        |
| <b>Calcitonin-like diuretic hormone receptor 1 isoform B</b>                   | Dh31                 | RPRC009814      | KQ035556 and KQ034793           | 411  | Yes                                                | First 77 amino acids located in KQ035556. Identical to GenBank sequence Acc. N° AHB86317 [15]                                          |
| <b>Calcitonin-like diuretic hormone receptor 1 isoform C</b>                   |                      | -               | KQ035556 and KQ034793           | 409  | Partial                                            | First 77 amino acids located in KQ035556. New gene model included. Identical to GenBank sequence Acc. N° AHB86318 [15]                 |
| <b>Calcitonin-like diuretic hormone receptor 2</b>                             |                      | RPRC004753      | KQ034099                        | 410  | No                                                 | VectorBase prediction edited according to GenBank sequence Acc. N° AHB86571 [15]                                                       |
| <b>Calcitonin-like diuretic hormone receptor 3</b>                             | -                    | RPRC004735      | KQ034099                        | 420  | Yes                                                | Initial methionine fixed and an internal region was added to VectorBase prediction                                                     |
| <b>Corticotropin-releasing factor-related like diuretic hormone receptor 1</b> | Dh44                 | -               | KQ034141 and KQ035235           | 465  | Yes                                                | New gene model created.                                                                                                                |

| Gene                                                                                     | Ligand                          | VectorBase code | Scaffold | Aas. | Hit against the antennal <i>de novo</i> assemblies | Comments                                                                                                                          |
|------------------------------------------------------------------------------------------|---------------------------------|-----------------|----------|------|----------------------------------------------------|-----------------------------------------------------------------------------------------------------------------------------------|
| <b>Corticotropin-releasing factor-related like diuretic hormone receptor 2 isoform A</b> | Dh44                            | -               | KQ034325 | 385  | No                                                 | VectorBase prediction modified according to GenBank sequence Acc. N° KU942308 [16]. NTE is missed. CTE region was extended.       |
| <b>Corticotropin-releasing factor-related like diuretic hormone receptor 2 isoform B</b> | Dh44                            | RPRC000578      | KQ034325 | 485  | Yes                                                | VectorBase prediction modified according to GenBank sequence Acc. N° KJ407397 [16]                                                |
| <b>PDF receptor</b>                                                                      | PDF                             | RPRC009680      | KQ034059 | 318  | Partial                                            | The NTE region extended. Initial methionine is still missed                                                                       |
| <b>Parathyroid hormone like receptor</b>                                                 | -                               | -               | KQ034058 | 498  | Yes                                                | Predictions RPRC011083 and RPRC011086 fused and edited                                                                            |
| <b>OTHER G-PROTEIN COUPLE RECEPTORS</b>                                                  |                                 |                 |          |      |                                                    |                                                                                                                                   |
| <b>Long wave sensitive opsin 1 (LWS)</b>                                                 | -                               | RPRC010623      | KQ034901 | 377  | No                                                 | No changes in VectorBase prediction                                                                                               |
| <b>UV opsin</b>                                                                          | -                               | RPRC002621      | KQ034248 | 387  | Yes                                                | No changes in VectorBase prediction. Initial methionine is missed                                                                 |
| <b>COpsin / Pteropsin</b>                                                                | -                               | RPRC017360      | KQ034389 | 301  | No                                                 | No changes in VectorBase prediction                                                                                               |
| <b>Rh7</b>                                                                               | -                               | RPRC015283      | KQ034074 | 361  | Partial                                            | No changes in VectorBase prediction. Initial methionine is missed                                                                 |
| <b>Tyrosine kinase and guanylyl cyclase receptors</b>                                    |                                 |                 |          |      |                                                    |                                                                                                                                   |
| <b>Eclosion hormone receptor</b>                                                         | Eclosion hormone                | RPRC013306      | KQ034473 | 1160 | No                                                 | No changes in VectorBase prediction. Initial methionine is missed                                                                 |
| <b>NPLP receptor</b>                                                                     | NPLP                            | RPRC013388      | KQ034473 | 1159 | Yes                                                | NTE and CTE must be extended. Initial methionine is still missed                                                                  |
| <b>Potential neuroparsin receptor*</b>                                                   | Ovary ecdysteroidogenic hormone | RPRC006045      | KQ034063 | 1290 | Yes                                                | The first exon was extended. Initial methionine was fixed. In VectorBase, initial methionine is missed due to an assembly problem |
| <b>Insulin receptor*</b>                                                                 | Insulin                         | RPRC006251      | KQ034536 | 1198 | Yes                                                | Initial methionine must be fixed and some internal changes are necessary                                                          |

\* The sequences included in the Additional file 13: Data file S2 for these genes are those obtained after the comparison to our antennal transcriptome assemblies and the adequate correction. The gene models included for these genes in our GFF file were those available in VectorBase.

CT/DH receptor 1 (variant A) and CT/DH receptor 2 (variant A) reported by M Zandawala, S Li, F Hauser, CJ Grimmelikhuijzen and I Orchard [15] are a partial sequences (143 and 122 amino acids length, respectively), and they do not have VectorBase prediction. A partial CRF/DH receptor 1 variant A sequence was reported by H-R Lee, M Zandawala, AB Lange and I Orchard [16], however, it is not available in GenBank.

1. Paluzzi J-PV, Bhatt G, Wang C-HJ, Zandawala M, Lange AB, Orchard I: **Identification, functional characterization, and pharmacological profile of a serotonin type-2b receptor in the medically important insect, *Rhodnius prolixus***. *Front Neurosci* 2015, **9**:175.
2. Zandawala M, Haddad AS, Hamoudi Z, Orchard I: **Identification and characterization of the adipokinetic hormone/corazonin-related peptide signaling system in *Rhodnius prolixus***. *The FEBS Journal* 2015, **282**(18):3603-3617.
3. Zandawala M, Hamoudi Z, Lange AB, Orchard I: **Adipokinetic hormone signalling system in the Chagas disease vector, *Rhodnius prolixus***. *Insect Mol Biol* 2015, **24**(2):264-276.
4. Zandawala M, Orchard I: **Identification and functional characterization of FGLamide-related allatostatin receptor in *Rhodnius prolixus***. *Insect Biochem Mol Biol* 2015, **57**:1-10.
5. Alzugaray ME, Adami ML, Diambra LA, Hernandez-Martinez S, Damborenea C, Noriega FG, Ronderos JR: **Allatotropin: an ancestral myotropic neuropeptide involved in feeding**. *PLoS One* 2013, **8**(10):e77520.
6. Paluzzi JP, Park Y, Nachman RJ, Orchard I: **Isolation, expression analysis, and functional characterization of the first antidiuretic hormone receptor in insects**. *Proc Natl Acad Sci U S A* 2010, **107**(22):10290-10295.
7. Lee D, Broeck JV, Lange AB: **Identification and expression of the CCAP receptor in the Chagas' disease vector, *Rhodnius prolixus*, and its involvement in cardiac control**. *PLoS One* 2013, **8**(7):e68897.
8. Hamoudi Z, Lange AB, Orchard I: **Identification and characterization of the corazonin receptor and possible physiological roles of the corazonin-signaling pathway in *Rhodnius prolixus***. *Front Neurosci* 2016, **10**:357.
9. Ons S, Lavore A, Sterkel M, Wulff JP, Sierra I, Barnette JM, Rodriguez MH, Rivera-Pomar R: **Identification of G-protein coupled receptors for opsins and neurohormones in *Rhodnius prolixus*. Genomic and transcriptomic analysis**. *Insect Biochem Mol Biol* 2015.
10. Sedra L, Paluzzi J-P, Lange AB: **Characterization and expression of a long neuropeptide F (NPF) receptor in the Chagas disease vector *Rhodnius prolixus***. *PLoS One* 2018, **13**(8):e0202425.
11. Paluzzi J-PV, Haddad AS, Sedra L, Orchard I, Lange AB: **Functional characterization and expression analysis of the myoinhibiting peptide receptor in the Chagas disease vector, *Rhodnius prolixus***. *Mol Cell Endocrinol* 2015, **399**:143-153.
12. Lee D, James T, Lange A: **Identification, characterization and expression of a receptor for the unusual myosuppressin in the blood feeding bug, *Rhodnius prolixus***. *Insect Mol Biol* 2015, **24**(1):129-137.
13. Paluzzi J-P, O'Donnell MJ: **Identification, spatial expression analysis and functional characterization of a pyrokinin-1 receptor in the Chagas' disease vector, *Rhodnius prolixus***. *Mol Cell Endocrinol* 2012, **363**(1-2):36-45.
14. Ons S: **Neuropeptides in the regulation of *Rhodnius prolixus* physiology**. *J Insect Physiol Paris* 2017, **97**:77-92.
15. Zandawala M, Li S, Hauser F, Grimmelikhuijzen CJ, Orchard I: **Isolation and functional characterization of calcitonin-like diuretic hormone receptors in *Rhodnius prolixus***. *PLoS One* 2013, **8**(11):e82466.
16. Lee H-R, Zandawala M, Lange AB, Orchard I: **Isolation and characterization of the corticotropin-releasing factor-related diuretic hormone receptor in *Rhodnius prolixus***. *Cellular Signalling* 2016, **28**(9):1152-1162.
