# Supplementary material for: Transcriptomics supports local sensory regulation in the antenna of the kissing-bug Rhodnius prolixus
Source: PubMed Central journal article supplement (PMC6993403; doi:10.1186/s12864-020-6514-3), 2020-01-30
Supplement: 12864_2020_6514_MOESM4_ESM.pdf [file 12864_2020_6514_MOESM4_ESM.pdf]

**Table S3. Details of enzymes involved in the biogenic amine synthesis.** Columns are: Gene – the gene and protein name we are assigning; VectorBase code – the official gene number in the RproC3 genome assembly, prefix is RPRC; Scaffold – the RproC3 genome assembly supercontig ID; AAs – number of encoded amino acids in the protein; Comments – comments on the OGS gene model and repairs to be performed on the genome assembly (available on VectorBase) based on Blast searches against *de novo* antennal transcriptome assemblies. NTE: Amino terminal region.

| Gene                                          | VectorBase code | Scaffold | AAs. | Hit against the antennal<br><i>de novo</i> assemblies | Comments                                              |
|-----------------------------------------------|-----------------|----------|------|-------------------------------------------------------|-------------------------------------------------------|
| <b>Tyrosine 3-monooxygenase (<i>ple</i>)</b>  | RPRC007034      | KQ034272 | 569  | Yes                                                   | Some internal problems were detected*                 |
| <b>DOPA decarboxylase (<i>Ddc</i>)</b>        | RPRC005884      | KQ034063 | 629  | Yes                                                   | NTE region must be extended until initial methionine* |
| <b>Tyrosine decarboxylase-2 (<i>Tdc2</i>)</b> | RPRC011470      | KQ034319 | 476  | No                                                    | Fine as is                                            |
| <b>Tryptophan hydroxylase (<i>Trh</i>)</b>    | RPRC012297      | KQ034056 | 490  | No                                                    | Stop codon is missed                                  |

(\*) The sequences included in the Additional file 13: Data file S2 for these genes are those obtained after the comparison to our antennal transcriptome assemblies and the appropriate correction.
