# Supplementary material for: Transcriptomics supports local sensory regulation in the antenna of the kissing-bug Rhodnius prolixus
Source: PubMed Central journal article supplement (PMC6993403; doi:10.1186/s12864-020-6514-3), 2020-01-30
Supplement: 12864_2020_6514_MOESM5_ESM.pdf [file 12864_2020_6514_MOESM5_ESM.pdf]

**Table S4. Details of neuropeptide processing enzymes.** Columns are: Gene – the gene and protein name we are assigning; VectorBase code – the official gene number in the RproC3 genome assembly, prefix is RPRC; Scaffold – the RproC3 genome assembly supercontig ID; AAs – number of encoded amino acids in the protein; Comments – comments on the OGS gene model and repairs to be performed on the genome assembly (available on VectorBase) based on Blast searches against *de novo* antennal transcriptome assemblies.

| Gene                                                                | VectorBase code | Scaffold | AAs. | Hit against the antennal <i>de novo</i> assemblies | Isoforms | Comments                                                                                                                                     |
|---------------------------------------------------------------------|-----------------|----------|------|----------------------------------------------------|----------|----------------------------------------------------------------------------------------------------------------------------------------------|
| <b>Signal Peptidase (SP)</b>                                        | RPRC009668      | KQ034208 | 375  | Yes                                                | No       | CTE is missed                                                                                                                                |
| <b>Amontillado (Prohormone convertase 2- PC2)</b>                   | RPRC009349      | KQ034234 | 640  | Yes                                                | No       | Initial methionine is missed                                                                                                                 |
| <b>Silver (Carboxypeptidase D)</b>                                  | -               | KQ034072 | 1129 | Yes                                                | No       | New gene model was created. RPRC011379, RPRC011383 and RPRC0011427 were fused. Partial sequence, methionine and stop codon are still missed* |
| <b>Prolyl endopeptidase</b>                                         | RPRC006929      | KQ034086 | 690  | Yes                                                | No       | Methionine and stop codon missed. Identified using <i>D. melanogaster</i> sequence CG5355                                                    |
| <b>Carboxypeptidase M (CPM)</b>                                     | RPRC015124      | KQ034103 | 454  | No                                                 | A        | Methionine is missed. Identified using <i>D. melanogaster</i> sequence CG4678                                                                |
|                                                                     |                 |          | 471  | Yes                                                | B        | New isoform identified in the antennal transcriptome                                                                                         |
|                                                                     |                 |          | 525  | Yes                                                | C        | New isoform identified in the antennal transcriptome                                                                                         |
| <b>Peptidylglycine alfa-hydroxylating mono-oxygenase (PHM)</b>      | -               | KQ034112 | 329  | Yes                                                | No       | VectorBase predictions RPRC001216 and RPRC001217 must be fused and edited                                                                    |
| <b>Furin (Fur) like protease-1</b>                                  | RPRC006957      | KQ034094 | 810  | Yes                                                | No       | A total of 126 amino acids are missed in NTE region. Some internal problems were detected                                                    |
| <b>Fur-like protease 2A</b>                                         | RPRC002472      | KQ034090 | 1162 | Yes                                                | No       | NTE and CTE are missed                                                                                                                       |
| <b>Fur-like protease 2B</b>                                         | RPRC013490      | KQ034542 | 688  | Yes                                                | No       | NTE and CTE are missed                                                                                                                       |
| <b>Peptidyl-alpha-hydroxyglycine alpha-amidating lyase 1 (PAL1)</b> | -               | KQ034270 | 438  | Yes                                                | No       | An internal region is missed due to problems in the genome assembly. CTE region located in the opposite strand*                              |
| <b>Peptidyl-alpha-hydroxyglycine alpha-amidating lyase 2 (PAL2)</b> | -               | KQ034195 | 370  | Yes                                                | No       | The first two exons located in the opposite strand*                                                                                          |

\* These models were fixed and included in the modified GFF file that was used for mapping of our RNASeq reads.

The sequences included in the Additional file 13: Data file S2 for all genes are those obtained after the comparison to our antennal transcriptome assemblies and the adequate correction.
