# Supplementary material for: Transcriptomics supports local sensory regulation in the antenna of the kissing-bug Rhodnius prolixus
Source: PubMed Central journal article supplement (PMC6993403; doi:10.1186/s12864-020-6514-3), 2020-01-30
Supplement: 12864_2020_6514_MOESM12_ESM.pdf [file 12864_2020_6514_MOESM12_ESM.pdf]

**Table S7 - Differentially expressed modulatory genes among stages studied.** Comparison of normalized CPM among stages was conducted using edgeR package. CPM: count *per* million, L: larval; F: female, M: male; LogFC: Log fold change; FDR adjusted p value: False Discovery Rate; n.s.: not significant.

| Annotation                                  | VectorBase Code          | CPM in L library | CPM in F library | CPM in M library | LogFC L vs. F | LogFC L vs. M | LogFC F vs. M | All comparisons |                      | L vs. F pairwise comparison |                      | L vs. M pairwise comparison |                      | F vs. M pairwise comparison |                      |
|---------------------------------------------|--------------------------|------------------|------------------|------------------|---------------|---------------|---------------|-----------------|----------------------|-----------------------------|----------------------|-----------------------------|----------------------|-----------------------------|----------------------|
|                                             |                          |                  |                  |                  |               |               |               | p value         | FDR adjusted P value | p value                     | FDR adjusted p value | p value                     | FDR adjusted p value | p value                     | FDR adjusted p value |
| Allatostatin-A                              | -                        | 13.52            | 0.77             | 0.34             | 4.121         | 5.301         | 1.179         | 7.16E-08        | 1.05E-05             | 9.57E-05                    | 0.009                | 2.62E-06                    | 3.56E-04             | 0.247                       | 0.993 (n.s.)         |
| Myoinhibitory peptide                       | -                        | 16.25            | 0.90             | 0.77             | 4.171         | 4.392         | 0.221         | 7.13E-07        | 8.43E-05             | 7.80E-05                    | 0.008                | 3.86E-05                    | 0.003                | 0.820                       | 0.993 (n.s.)         |
| Adipokinetic hormone receptor               | -                        | 9.65             | 0.77             | 1.25             | 3.634         | 2.948         | -0.686        | 1.48E-04        | 0.008                | 4.48E-04                    | 0.032                | 0.003                       | 0.090 (n.s.)         | 0.478                       | 0.993 (n.s.)         |
| Calcitonin-like diuretic hormone receptor 3 | RPRC004735               | 12.21            | 119.18           | 145.18           | -3.287        | -3.571        | -0.285        | 0.001           | 0.050                | 9.93E-04                    | 0.055 (n.s.)         | 4.12E-04                    | 0.020                | 0.775                       | 0.993 (n.s.)         |
| Kinin receptor 2                            | -                        | 0.73             | 9.27             | 12.96            | -3.662        | -4.146        | -0.483        | 3.81E-04        | 0.017                | 3.99E-04                    | 0.029                | 8.56E-05                    | 0.006                | 0.599                       | 0.993 (n.s.)         |
| <i>Rproto11</i>                             | RPRC005773               | 123.61           | 5.12             | 4.45             | 4.592         | 4.796         | 0.203         | 3.83E-08        | 5.93E-06             | 1.55E-05                    | 0.002                | 7.83E-06                    | 8.68E-04             | 0.825                       | 0.993 (n.s.)         |
| <i>Rproto3</i>                              | RPRC008440               | 107.42           | 3930.32          | 2090.78          | -5.193        | -4.283        | 0.911         | 1.19E-05        | 9.53E-04             | 1.92E-06                    | 4.42E-04             | 4.11E-05                    | 0.004                | 0.322                       | 0.993 (n.s.)         |
| <i>HNF4B</i>                                | RPRC001064               | 1.33             | 0.07             | 0.00             | 4.103         | 8.879         | 4.776         | 3.68E-07        | 4.65E-05             | 6.61E-04                    | 0.041                | 2.72E-06                    | 3.65E-04             | 0.054                       | 0.993 (n.s.)         |
| Allatostatin-CC                             | RPRC000300               | 454.29           | 58.15            | 23.87            | 2.966         | 4.250         | 1.285         | 1.66E-05        | 0.001                | 0.92                        | 1 (n.s.)             | 8.77E-05                    | 0.006                | 0.166                       | 0.993 (n.s.)         |
| Hormone receptor-like in 3                  | RPRC000824<br>RPRC003681 | 0.23             | 1.60             | 4.58             | -2.787        | -4.305        | -1.518        | 3.56E-04        | 0.017                | 0.008                       | 0.219 (n.s.)         | 4.61E-05                    | 0.004                | 0.111                       | 0.993 (n.s.)         |
| Octopamine beta receptor 3                  | -                        | 0.52             | 1.75             | 5.63             | -1.742        | -3.426        | -1.684        | 0.003           | 0.075                | 0.078                       | 0.785 (n.s.)         | 9.10E-04                    | 0.036                | 0.775                       | 0.993 (n.s.)         |
| <i>Rproto2</i>                              | RPRC010096               | 16437.45         | 2145.13          | 978.26           | 2.938         | 4.071         | 1.133         | 2.98E-05        | 0.002                | 0.003                       | 0.112 (n.s.)         | 8.21E-05                    | 0.006                | 0.022                       | 0.993 (n.s.)         |
