# Supplementary material for: Transcriptomics supports local sensory regulation in the antenna of the kissing-bug Rhodnius prolixus
Source: PubMed Central journal article supplement (PMC6993403; doi:10.1186/s12864-020-6514-3), 2020-01-30
Supplement: 12864_2020_6514_MOESM15_ESM.pdf [file 12864_2020_6514_MOESM15_ESM.pdf]

CT and CRF DH receptor sequences

=====

>ClecCT/DHR1-CLEC000667

MTDDVSNETYIDLNADILNVRRTQCLEFINESKPLEGLHCEPVFDTWTCWPATLAGSVATNPCPHFIVGFDPSRKAHKVCTE  
NGTWFRHPESGQIWSNYTTCVNLDDLRLRQQVNNIYQAGYFISLLALLLSLFIYSYFKSLRCRPNLHMLNFTSFAFNNFLWL  
LWYRLVIPNTDVIVKNRVWCQCLHVVLHYFLACSYAWMLAEGVYLHTLLVSAFTSEQKLVKILTACSWLVPFFFTALYTTLRL  
ASGDTQQCWIDESDSKMLVFLVATSMLLNFLFCNIVRVVVKLRAGPNQSARPSTALLQALRATLLLLPLLGLNYLLTPFR  
PPDKHPWETYEVVSALTASFQGLCVATLFCFCNGEVIAQMKRQWQYSVFRTRANSYTATTVSKSVYLQFVRSTAAPAAEE  
EIV

>HhalCT/DHR1-XP\_024216452.1

DSDFLQCAIYNESKSKNLEGSYCEATWDGWSCWQETPAGTTAYAHCPKFITGFDPNLLAHKICTENGTWFKHPDSGMV  
WSNYTTCVNIEDLTLRQTVNNIYQTGYSISLVALLLSLFIYSYFKALRCRPNLHKNLFTAFAANNFLWLLWYRLVLPFPEVVIE  
NGVWCQCLHVILHYFLLSCYAWMLAEGVYLHTLLVSAFTSEQKLVRLITVFSWTAPLFFIFLYSVLRLVFDLTDQCWINDSDY  
SSVLVVLVVASMGLNLGFLCNIVRVVVGKLRAGPSQSSRPSQALLQALRATLLLLPLLGLNYLLTPFRPPNDHPLESYYEILSAF  
TASFQGLCVATLFCFLNGEVMAQIKRQWQYATFRTRANSYTATTVSFVRSTAAPTAEEENV

>ApisCT/DHR1-XP\_016661057.1

IVGTAYKICNKNATWFKHPISGAVWSNYTTCINHEDYNWTQQINTIYQTGYLVSFIALLLSIALTYFKSLRCARNTLHMHMFT  
SFAINLLWLLWYRLVVEHPSVVLHNGWWCQILHVILHYFLLTNYAWMLAEGFYLHTLLVFAFTSEDTLVRWSWTLAWST  
PLVVISLYTLRTIYDHTSECWINESPFTEVLVVPVCMALNLVFLCNIVRVLWVKLQAGPSHLSNSTPSRLLQAFRATLLL  
LPLLGLHYLLTPFRPPKQHPWEPFYEVVSATSSSQGLCVATLFCFLNGEVVAQIKRQWQFMFFRTRANSYTATTVSVRQFV  
RSTAGPGDNEDKV

>TcasCT/DHR1-TC002694

MEQMRQHCLVYFKCEKDGWVNFNEQFNKSWVNYTTCINIEDFEFRQQIILIYCVGYGVSLVALLVSLALLTYFKSLRCARITV  
HMNLFSSFAMNFLWLLWYSLVNDQDVLHENKLWCRVLHVLFVFLISNYSWMLCEGIYLHTVLVSAFISERRLLRCMLA  
LGWGIPLLTTSIYAPVRSVLGENVDELGRCWTQDGRFNKILMVPVITVFLNVIFLNIVRVLLIKLRKGPANGGSGSGASRT  
SLQALRATMLLVPLLGLNFLTFRPEANHPWEYVYEVVSALTASLQGIQPFMFFWYRDQNHWS

>DmelCT/DHR1-CG32843

MSDQIGNPNATFSGSGSGSGTNVASIAESVAESGPDFDALRAACETRLNASGQLAGSGGPGAEAGTHCAGTFDGLWLCW  
PDTAVGTSAYELCPDFITGFDPPARYAHKECGLDGWFKHPLTNKTSNYTTCVNLEDLNWRHTVNLISEVGYGTSLLAILLS  
LAILGYFKSLKCARITLHMNLFASFAANNSLWLVWYLLVMPNSELLHQSPMRCVALHITLHYFLLSNYSWMLCEGFYLHTVL  
VAFISEKRLVKWLIAGFWGSPAIVFVYSMARGLGGTPEDNRHCWMNQNTNYQNILMVPVCISMFLNLLFCNIVRVVLLK  
LNAPASIQGSCGPSRTVLQAFRATLLLVPLLGLQYILTPFRPAPKHPWENTYIISAFTASFQGLCVAILFCFCNGEVIAQMKR  
KWRMMCFSNRPRNTSYTATQVSFVRCGPPLPGEEKV

>AmelCT/DHR-LOC412591

MILSMRPSPTWLKMDVQTEDIVLLAGEQGRITITIVQISRLISEVANLISNMNASLKRCGHLASNFTKTYCLMPANATAG  
STLPDEEIHRIIMEREQECLQLEAMNSTPPPGPYCRLTFDGLWSCWPNTPAGATAYVPCPNFITGFDASLRAHKYCELNGTW  
FRHPESGQVWSNYTTCVNLKDLWQQINGLYEAGYAIALLLSLILTYFRSLRCARITLHMNLFASFVNNALWLVWY  
RCIVANTDLLLNNGMTCRLLHIVLHYFLLTNYAWMLCEGFYLHTLLVSAFTSEQKLVKWLMLIGWPVPAIIVTIYACLRATSN  
DLTDTEQCWINEGNYMNVLVYPVCVSTLLNVLFLFNIVRVLLMKLKLAGPSIGTQPSRSMRQAFRATLLLVPLLGLHYLVIPFR  
PPKNHPWEHFYEVLSAITASFQGLCVAILFCFCNGEVIAQFKRQWEGSAFLRNANSCTATTVSVRQIHKT

>AgamCT/DHR1-AGAP009770

AKHRYKPTRGTLQVTNPRITPFTALNVEPHIRFPTKLSSSRVKTSSPQPRNSMALSTTTDASVDEIAQKRLECLETLNETVDT  
TISGFAHKVCSENGWFRHPETNRSWSNYTTCINLDDFEAGCITLHLVLHYFLLTNYSWMLCEGFYLHTVLVSAFVSEKLLK  
WLLALGWGSPAFFIVLYGFLRGYASPPNDTIECWMDSSFNKVFVGPVCISMLLNLVFLFNIMRVLLKLPAGPQGGAGP  
SRTILQAFRATLLLVPLLGLQYILTPFRPGNGHPYERTYETMLACTSSSQGLFVAVLFCFLNGEVIAQVQRKWRTVFLRTRANS  
YTATQVSVSTLTVLRV

>AaegCT/DHR1-AAEL010043

MTSSTTTDATDSEFDQRKLCLEMLNATTEFTTTRSGPFCRGTWDGLWLCWPDTAAGESALLPCPDFMDGFDPTRFHAKD  
CDEDEGEWFRHPLTNRTWSNYTTCVNLKLEWMEQVRIYETGYSISLIALILSLGILSYFRSLKCARITLHMNLFASFASNNL  
WLLWYRMVLADPEVLKHNGASCITLHLVLHYFLITNYAWMLCEGFYLHTVLVSAFVSEKLVNWLVLVGLWTTTPGIVIMAY  
GFLRGYAGTPEDTIECWMDNESVDNVFKAPVCISMLLNLLFCNIIIRVVLLKLPAGPQGTGPSRTILQAFRATLLLVPLLGL  
QYILTPFRPDPGHSYERTYIISAFTASFQGLFVAVLFCFFNGEVIAQVQRKWRTVFLRTRTNSYTATQVSPVRLQFIRSGPPI  
GEEKV

>Dmelhector-CG4395

MATTSSDSESQNVDDVASQAQTQDNLRIFLKHLYAECVFRYQNVTYDTPSFSLGPATDYDSDLPENFSPVPRYLENAAM  
NEGVIDMRNVDEELAEKEELMATVVSATMATNQKENRFLCPLNFDGYLCWPRTAGTVLSQYCPDFVEGFNRKFLAHT  
CLENGSWYRHPVSNQTSWNYTNCVDYEDLEFRQFINELYVKGYALSLLALLISIIIFLGFKSLRCTRIRIHVHLFASLACTVAV  
ILWYRLVVERSETIAENPLWCIGLHLVHVYFMLVNYFWMFCEGLHLHLVLLVVFVKDTIVMRWFVIVSWFSPPIAIVYGLAR  
HFSSPDNKHCWITDSLWYFVSPITLSLLASFILINLVRVIRKLPQSAQPAPLAIRKAVRATIILVPLFGLQHFLLPYRPDAG  
TQLDHFYQMLSVVLSLQGFVVSFLFCFANHDVTFAIRTLNKLPSLVTPPPAGSNTGQMATTTPSRELGV

>ClecCT/DHR2-CLEC025204

MRAYCPAAFDGWSCWNTTPSGETALAPCPYFVTGFDIKRFAFRKCLDNGSWFRHPDTGQPWSNYTTCIDMDDLEVREIV  
NTIYVVGYYVSFAALVLSLLIFLTFRSLRCTRIRIAHIQLFSSFAANLMMWIIWYKLVVGNSTSVVQRNQPFCQILHIVLQYLMVA  
NYLWMFCEGLHLHLVVFVKDNSAMRWFCYIGWVFPGILTAIYASVRYWYTEETRQCWMNESHTQWILTAPVCFMS  
LASLGLINVVRLTLKHCNSANPAPIGLRKAVRAALILVPLFGIHHILIPFRPEPNAPGERAYQIFSALLVSLQVIISYRYKNTG  
KVLMMFKCLSISDRATIKPNFN

>HhaICT/DHR2-XP\_024217979.1

MKLREREIRKRHQLEMFPKQVADRTGLRPYCAATFDGWSCWNTTPSGEIALAPCPNFVTGFDTKRFAFRKCMDNGSWF  
RHPDTGQPWSNYTTCVDMDDLEFRKIVNIIYVVGYSVFAAIVISLIIFLTFRSLRCTRIRIAHVQLFSSFAANDLMWIVWYKM  
VIGNPIVVQENRFMCQALHVLLQYLMVANLWMFCEGLHLHLVVFVKDDNAMRWFFYFIGWFLPAILAGIYALVRSSY  
PDETSQCWLSESHQWILTVPVLLSMLASLGLINVVRLTLKHCNSANPAPIGLRKAVRAALILVPLFGIHHILIPFRPEPNG  
PGERVYQVFSALLVSLQGFVSLFCFANVDVHAFAKAMARRIRRRATDNGNLATQTRREV

>ApisCT/DHR2-XP\_016661373.1

MYCRSLHVALQFFMVANYMWMFCEGLHLMALVVFVNDVNAMRWFYAIGWVGPVALTVLVSWRSNSEDTAQCW  
MHESHQWVLTVPVFASILTSLMFLMNVMRVLLTKLHRNSTNPAPIGVRKAVRAALILVPLFGIHYILIPYRPHKHTTVETVY  
QIFSVVLVSTQVSDARLPSTVRACISIATVKNFAKIIYYCTNVWIPLRCTSMDIGRDPKRVHLIHRSRATSIS

>AaegCT/DHR2-AAEL006490

MIETIEEPQRNQTGLFANDNQSNWFPMAMEERPTSGIAASADGIQYDRLKYADPEALMRHLYACMRNVTNSGSFPAE  
QAVTVLRSISASNARHDQQTQLFCPRRFDGWTCWESQPAGTIAQNFPCNFVLGFDASRLAYRICHANGSWFTHPESGRE  
WSNYTNCIDVDDMKFRRLVNDLYIGGYTISLVTLIVSLCVFFSRTLKCTRIRIHINLFTSLALSACAFWILWYKFVVEDPDVTNR  
NGNWCIALHILLHYLMLVNYFWMFCEGLQLHLVLVVIFKIDAIAMRWFFTIGWILPVAFVSIYASVRNKYTLDEHCWMNE  
SHAMWLLTIPVCFSLVASLVLINVVRLTLKLNSTSPNAPLGLKATRATLILIPFGLQHILLPFRPDKGCELERYYQVVSVA  
LISLQGACVSLFCFANHDVIFAIKCQLSRFFPTLVHHPFRESYNGGQPATQSRDMVV

>TcasCT/DHR2-TC013321

MDVTNGTNCGGKYTRPGYCEIFDEMLCWPETLGGTTVNQSCPKMGYDSRRFAYKDCLENGSWFKHPKSGKIWTNYT  
TCVDHEDLAFRTHINHLFVIGYSISLAALVISLAIFFTRTLKCTRIRIHIQLFISFALNLMWIIWYKEVVPNFVTIRNELWCQ  
ALHLVVHYLMLANMWMFCEGLHLHLVVFVRDAETMKWFFALGWGAPFIIVLIYSVVRIFILKDNMCMWMAADSYYS  
SWILTAPVCISLLVSLIFLINLVRVILTIMHPNSANPAPMGLRRAARAALILIPFGLQHILIPFRPDMYDPYEHLYQYVTVVVVT  
LQGLCVSCLFCFANQDVHQAIRGFMHRKVYRTRWSNYHYTGAADSAGVYVVGSSHCNNVGLLSLKRKSTTTVKL

>AgamCT/DHR2-AGAP001175

MTIREDAEELVRDLAKANGSAYFGQTGMIDAGGRVGDGQDQGIQFDRLEFESPEDLMRHYTCMRSNTSEPPWTTD  
GSTVFCPRRFDGWSCWEPTLAGTVAENWC PKFVLGFDPRRLAYRTCHENGSWFVHPHSGREWSNYTNCIDTEDMQLRR  
LVNDIYIGGYTVSFLTLIISLCIFHSFRTLKCTRIRIHIHLFTSLALSCLFWIVWYKFVVEDPDVLANANTPLTSICVTVPGNSCAYKQ  
SSLQGWCVGLHILLHYLMLVNYFWMFCEGLHLHLVLVIVSIRAHPGDIPRGRLECHRATISQGWCRLLPFSVRFNSIRLIFPLF  
HRRHRHHIRTDAFFSVFFRVLLTAGKKVFIKDIVAMRWVFTIGWILPMALASLVLINVVRLTLKLSSTSPHPAPLGLRKATR  
ATLILIPFGLQHILLPFRPEKGC SLERYYQIGAALLISLQGLCVSCLFCFANHDVIFAVQCYSRFFPDVTHPFLESNGGQPAT  
QSRDVVV

>ApisCT/DHR3-XP\_016661370

MADYQYGLSNIQDNHILHQVIAERRKMCEVMDPPMSDSAWCPGEFDGWTCINRTKAGEVAKFPCPYFILGFDTKRF  
GQKTCLPDGSWFKHPDSNKTWSNYTTCVDLEDLKRNVNMIYKWGYTVSLAALAVSIFIFFYFRSLTCTRIQIHKNLFI  
VNNCLWLWVYEAVDNLPVLMTNGLGCKLLHVLVQYFLVATYFWMFCEGLYLHTLLVVTFLTESKVMPLHTIGWGIPAL  
LVSTYAAALRTATPGETLHCWIHESLWSILSGPVCLSMANLVLINIVRLLVVKLHARQITMSSPKHVAPRERAQSFLRSFK  
RNNCSVDSYDKAPASSRTGKAVRATLILIPLLGLQYIVTPFRPEPGTSEVPYQVTSAVVASCOGLCVALLFCFCNGEVLSE  
MKKRWKHCWINKNGSWNPCMRGTSVSSPQHHPRLVTEDEQQTQRTGSIQVLPKDSAECLQNVQL

>HhaICT/DHR3-XP\_014287171

MIYTREEIDNITAIKKECFAVAENYTEGLFCPREFDGWTCINATPAGTVLHFPYFQLGFDPKRTAHRPCLENGTWFRHP  
ETNKPWSNYTTCVDLEDLFCFEMRNQVNFYIKAGYMISSLAALLSLFIFFFYFRSLTCTRIQIHKNFFISLAINLLWLIWYEA  
VLDNHTVIYENGVGCQILHVILQYFLVTTYFWGFCEGLYLYLLVVTFLTESKVMVCLYLIGWGPALIVSAYASLRISTNKD  
TDYCW

IQESIYRWTLIIPVGLSMIANLIFLITIVRVVLTKLHAAQKTTSPNSFKDKNASIRSKRSTVLSDTAFSERTKKAVRATLILIPILIGLQ  
YVVMIVRPEQKTTWEYTYELTEAIVASSQGLCVALLFCFCNGEVTA AVRKKWRQCRLSKRKPWNCSGVT SVSFRSSFVQ  
EMAGVVPPPHIDGLATGNCQL

>ClecCT/DHR3-CLECO13307

MIITQFMFTDGFSGPCKEFDGWTCINATSPGAVIHVPCPYFIFGFDPKRLGHRTCLEDTWFRHPDSNKTWTNYTTCVDTD  
DLKMRTQVNLIYKAGYTFSLAALLSIIFFYFKSLTCTRIQIHKNLFI SLAVNNLLWLWVYEAVVDNIPVLLSNGIGCQILHVLV  
QYFMVATYLMWFCEGLYHLLVVTFTVESKVM PVLHLIGWGV PALLVTVYASLRVSTKDDTLHCWIHESLYSWSLSGPVC  
LSMIANLVFLINIVRLLTKLRLPRRSTISSQGLPSGR TKKAVRATLILIPLLGLQYIVTPFRPEQGT SWEYPYQVTSALVASCQGL  
CVALLFCFFNGEVFLNLFNLKEENS NFALVLGCSGHEEKVATVQAE

>ClecCRF/DHR1-CLECO25139

MCITKKNFQEIRCFKLMEEERDQKDV CERSWDGLLWPPSRPGAAYLPCFEELHGIKYDTSQNATR WCHPNGTWANYSN  
YTKCSDLGKPAIEFEDGVEVTTMIYSIGYGLSLVALCLAVYIFIIYKELRCLRNTIHTNLMCTYILADFMWILNYSLQISVQTD FV  
PCVLLVILLHYFHLTNFFWMFVEGFYLYMLVVKFTQENIKLRVYLAIGWGNFCLKMNI NVLYTMFQIVMDPFQKGCHWM  
MPNMTDWIYQTPAIIVLVINLMFLVMIMLVLITKLSATNVETQQYRKA AKALLVLIPLLGITYILFIVGPSKGPYANLYEYVR  
SILISTQGLMVALFYCFLNTEVQNTVRHHLIRWKEARDIGVRRYTYCKTRSPNSDIESVR

>ClecCRF/DHR2-CLECO00652

MPTYDEPAENCPWSWDGALCWPSFPPGKNASLPCFEELKGIKYDTSQNASRYCFPNGTWSTYTNYNACQATVPENMVP  
EMPWVVGASTIYICIGYSISLVALCVAVWIFIYFKDLRCLRNTIHTNLMCTYILADFLWILN FALQILVPSDFICVVFVLLKYFILT  
NYFWMFVEGLYLYMLVAVTFTRENIKLRVYLGIGWGKCFFIGIISTASEELDRNCSWLT PHWSDWIDQSAALLVGVNLIF  
LFMIMLVLITKLRSSNNVETQQYRKASKALLVLIPLLGVTYIFFLVGP KTDIYEYIRAILLSTQGF SVALFYCFLNTEVQNTFRH H  
LRWKESRDIGHRRYTSKDWSPNTRTESIR

>HhaCRF/DHR2a-XP\_024216523.1

MASNLEVLKNLTTESQFELQSQCATLWSRKEPSGWCRAKFDGALCWGPTAPSHLSTQPCKEVINDVYYDTSKNATKFC D  
SNGDWNLTNYDNCQVRDFMVPDAEMTEMSTVIYSVGYTSLITLSLALFIFIYCKEMRCLRNTIHTNLMFTYVLADFMWIL  
SLTVQVSIHTDSISCLVFLTHYFLLTNFFWMFVEGLYLYMLV VETFTRENIGL RAYLAIGWGSPIVIVWIIARTTVQDPNA  
VTIMGVPETMNQCTMMYTSMTDWIYIIPVLVLLVNLFLCMIMWVLITKLSANNAETEYRKGSKALLVLIPLLGITYILL  
IAGPNASVYHNIRALLSTQGLTVGLLYCFLNTEVQNTLRHRWQRWREERSLPHRTYTKDSSPNTRTESIRLYSKHEVVPYRK  
RESTGSETTMTLVHGNSKISNGPRSSFLQPPSEPV

>HhaCRF/DHR2b-XP\_024216523.1

MEDQELTSNFSYHIREECLQRWSYHYQEGWCPAVFDGALCWGPTGPAVLASQPCREEIHGVLYDTSKNATKYCHESGI  
WDNRDIDYDQCQERADILATLTADDIEMTTVIYALGYALSIALSVALFIFIYFKEMRCLRNTIHTNLMFTYVLADFMWILSLTV  
SMHTDSVSLIFLTHYFILTFFWMFVEGLYLYMLV VETFTRENIGL RAYLAIGWGLPVAVIIVWVIARFNASDMPEVPPG  
TKQCTWMNQSWSDWIYQVPAIVLAINLLFLVRIMWVLITKLSANNAETEYRKGSKALLVLIPLLGITYILFIAGPQSAVYS  
NIRALLSTQGLSVGLLYCFLNTEVQNTLRHRWLRWKEERSLATRAYTKDMSPNTRTESIRLYSRHEITPYRKRESTGSEST  
MTLVHSSRLSNGPRSSFLQPPSEPV

>ApisCRF/DHR2-XP\_001944842.2

MNITSTNNTCLPEKVLNPGWCPSHWDLLLCWRTSKPGAVVYQACFDELNGMRYDTSQNASRRCKLNGVWENSSDYMN  
CRPLDTNPNLYPDPSIVYSYFYYGGYTISLVALVA AVSIFVYFKDLRCLRNTIHTNLMCTYILSDFTWILTSTLQEWLSASNNA  
CVLFTFSLHYFVLTNFFWMFVEGLYLYLVVETFTRENIKLRVYMF IGWGFPLVIMIVWGVSKITPIEVEERSDSCSWMTPHP  
VHDWIYQGPAIIVLVINLVFLSKIMWVLITKLSANSAETQQYRKASKALLVLIPLLGVTYILTMVGPTESGTYANYYSYGRATL  
LSMQGFMAIFYCFVNSEVKNTFKHHFIRWNDARNLRTGGSRRFTYSKDWSPNTRSDSVRLARPSIIADTMNKGKRAST  
VSSSTMTFIVSNGSGGVLLSNACQNRMLNAPPENLV

>ApisCRF/DHR1-XP\_008183744.1

MDYFNETWSPNEEAALKCRSWYEWDDR WINGCNASSDSLICWPPTPAGVIVYQPCFQELRGILYDTTKNASRICYENNT  
WGLTDFNDCTILGEPKAVTYDEEGTVDTIYLYIAGHCLSLIMTSLAIFVFCRFKELKLRNKIHSNLMASYLLAGIMWILNYTN  
LTDGTGFKCALLVPLYYFTMTNYFWAFIEGMYLFLVVDFTDRVRLRTYMAIGWGIPLIIPTWCVTRLLVPTKNDLDLYN  
QITYERYCPLMASVYVDDWIYQSPIVIVLLINSIFLVKIMRVLITKIRSTKSAETHNYKKATKALLVLIPLLGITFCLDMINPSSGLL  
VNIYKFSKVVIISTQGFTVSLLYCFNNEVQNTLKYHITRWQTKRKF LASKYGRSWLSVKQNNIICDHQLDPKELMPWIPA  
NNVRSSSCVSNGTTSALS NMRLPPDTTIEIPPEQQPLEDSKYVGAKP

>AmelCRF/DHR-LOC413829

MLRIQRELR CIRNNIHTNLMFTYILADFMWILNNVMQVSMQPDVPTCVAFSLFHYFQLTNYFWMFVEGLYLYLLVVKFTFT  
GDNIKRLRLCIIGWGPVLFITMWCIAKSLDQ NATSQDIALGKHCPWMVSHAYDWFYQAPAILVLCVNVVFLMIMWVLIT  
KLWSATNVETQQYRKASKALLVLIPLLGVTYVLVLTGPTEGQVANAFSYARAVLLSSQGLFVALFYCFLNTEVRNTVKSHIER  
WTTARDLDTERRLYCPPSNPYRKR DSSVSETTTTTVVGLNSTTTFLDKSKKAISED MNE

>TcasCRF/DHR1-TC007104

MDQGESEVVYARHEDIVRILNRLNETQAELACELKKTLSPPSNGCAVDFDTVLCWPQTAPNSLAVLPCFDQLNGIKYDTRE  
NATRLCFANGTWDQYSNYTSCKELSPLEVPEVELTTTTIYFIGYTVSLVALLFAVYIFWKFKDLRCLRNTIHMNLMCSYLADFM  
WIFVYSLQVPLQTNKAFICIFLIILLHYFHLTNFFWWMFVEGLYLYLVVKTFTGENIKPRIYAVIGWGGPILFVLVWGIKSAFTLPL  
EDQQAGEMFRSCPWTPHPFDWIYQGPAIAVLIINVFLLCIIMWVLITKLSANNVETQQYRKAALKALLVLIPLLVGTYLVIVG  
PTEGSRRIYDSIRAILLSTQGFTVALFYCFLNAEVKNTVRHHYNSWHTRRRTLGSRRTRYSSSKDWSSQARDSMRYGSKRAKL  
STLKY

>TcasCRF/DHR2-TC012799

MSWSEPLPQEPEVDADLWPSSENVLNEDIKIRLNITLQHCTSLYTNRTTALAETHPDGFCPVTTDGLLWPPPTPINETTY  
VKCFAELMNIRYDDTQNATRVCLANGTWTKADYSKCTEIIIPDVETQATYIFVGYVLSLITLSIALGIFTYFKELRCLRNRIHM  
NLMWSYMLMYIMWILTTLVLSKGGTGASIACIFVITLLHYFHISTFFWWMFVEGLYLYLVVETLTRENYKLRVYVCIGWGLP  
MIFILVWVIVKSFIPAAGDPATCTWFNSHDVDWIFQGPMLVLLLNLAFLAIMWVLITKLSANTVETQQYHKAALKALLVL  
MPLLGITYVITIYAPTDPKKSEIIFECVRAVLLSTQPLNEHPPICQSYSVAITGLHCRSILLLLKHGGAEHRPPPLRNVENTTISGPI  
QTTFGESQQGLVPQVTHGEYTVREKIFNDSLGTITFGSI

>AgamCRF/DHR1-AGAP005464

MANETMPTTPTAAAIAADDGSGGSPFGEENVGTGISVENPSLVEGLLALAMNASGAERCRLQQQAELLQDVACPSFFDM  
VSCWPRTPPGTLAVLPCFAELKGVQYDSSQNAFRFCNVDTWDNYTDYDRCEHLEQPPPLPSFEPEIELPTLIYFVGYSLA  
ALVLAVAVLVYFKDLRCLRNTHVNLFLTYIMSSSLWILLSLQITVKLEVAGCIFLVTLFHYFSTTNFFWMLVEGLYLYMLVVQ  
TFSGDTLRFRKYAIIIGWGGPLIFVGAWAIAKPFVGSVSNLEHPSKLEIECSWMRESHIDWIIQGPSCAVLVINLIFLLRIMWVLI  
TKLSANTVETRQYRKASKALLVLIPLLGITYLIVYGPVEGVGSHIFAITRAILLSTQGFVVSLLYCFLNSEVRQTLRHHFYRWR  
DERNILSGKVNHHRRPTFSKDNSPRSRTESTRLVLVKECASSVPAKHVLYCRLQVVVAFIHVCLFVFWCVCVSLFVFLY  
TLFAPCCHSSLIRSHSTWHTGSLQRFSLFLNYSKVC

>AgamCRF/DHR2-AGAP005465

MQSCLLSATLQPKPQKPRTAVERYQTNRDQTIYVPQKFCPTLWTVQMTGGIISNSIKPSGQRTTPTTLIRLQMDKIQPHA  
SGKRLVSVADYDELSFPPELLGAFENSTEFECLLRAHQDAQSETPSGGCPVDFDRILCWPKTDPGTWAVLPCFEFVKGVHY  
DVTQNA TRYCHPNGRWDNYSHYAACHHVNEPPDIVEISSIIYTYGILSLVALSLAVIVFVYFKDLRCLRNTHANLFITYILSA  
LLWIIILTLQLSSGSSTGMTSCVIFVTLHYFTLTNFFWMLVEGLYLYMLVVETFSGDNLRFNMYAAIGWGKCSRASLEIECS  
WMRESVVDWIFQGPVCAVLIINLVFLIRIMWVLITKLSANTVETRQYRKASKALLVLIPLLGITYLVVLAAPAEGVVSDFIFAIA  
RALLSTQGLSVSLFYCFLNSEVRLALRHRLERWRDERNIRLGQVRQSRMEKGPSKPESEPIHHATESLKGFIPLPFSSAG  
TVPLTYNKRESCASSATTTLLGPHSYPSAMRGSNGALHMQSIVPRAISPLMQVRRWGEGRKSVTNYPLRGAGN

>AaegCRF/DHR1-AAEL008292

MNDSSASVESLLALAGAGGDFAGSGSDGFPPMILNETLRDLCHQQNDTLFLELSCPLFDSISCWPRTPPATTAVLPCFS  
EFKGVQYDATQNA TRYCNIDGTWNSFANYDACKHLELPSSDPTLESFIELPIVIYFVGYTISLLALFCAVTVLVYFKELRCLRNTH  
HVNLVFTYIMSSSLWIIILSQQLAAKQGLVDCIFLVTLFHYFSTTNFFWMLVEGLYLYMLVVQTFSGDYLRFWKYSIIGWGGP  
LIFVGAWAIAKSFYPYDLMPEHPNKLEIECSWMRESHIDWIIQGPSCAVLVINLIFLLRIMWVLITKLSANTVETRQYRKASK  
ALLVLIPLLGITYLVVYGPHEGVSRIFAVTRAVLLSTQGLVVSLLYCFLNSEVRGTLRLHYRWRDERNIRLGIISKHRRPTISG  
TESIRTLEYSVVIMKSLAPPSRHHHHHHHHNNLGGSN

>AaegCRF/DHR2-AAEL019757

MTEPPDIVEVTSIIYSGYIVSLVALSLAVIVFVYFKDLRCLRNTHANLFITYILSALMWIIILTLQLSGSQSGIASCVILVTLHYF  
TLTNFFWMLVEGLYLYMLVVETFSGDNLRFNMYAAIGWGGPGVFMWVIAKGITISGLDQATTLEIDCSWMRESTVDW  
IFQGPVCAVLIINLVFLIRIMWVLITKLSANTVETRQYRKASKALLVLIPLLGITYLVVLAAPSEGVVSDFAVARALLSTQGFS  
VSLFYCFLNSEVRLALRHRLERWRDERNIRIGQVRQSRFTNSGLSKECSPRSRTESFRPLTYSKRESCASSATTTLLGPPVG  
AHGAYPSTMRGSNGALHLHAMAPRAISPLMQGLDENV

>DmelCRF/DHR1-CG8422

MSDHNHIDSVNASGSDPLLDLHNLDGIGESVELQCLVQEHEIASTYGNDSGHCLTQFDSILCWPRRTARGTLAVLQCMDEL  
QGIHYDSSKNATRFCHANGTWEKYTNYDACAHLPAPEVPEFEVIVELPTIYYIGYTLVSLVSLALIVFAYFKELRCLRNTHA  
NLFFTYIMSALFWILLVQJISIRSGVGSICALITLHFHTLTNFFWMLVEGLYLYMLVVKTFSGDNLRFNIIYASIGWGGPALFV  
VTWAVAKSLTVTYSTPEKYEINCPWMQETHVDWIYQGPVCAVLIINLTLRIMWVLITKLSANTVETRQYRKAALKALLVLI  
PLFGITYLVVLAGPSEGLMGHMFVAVLRVLLSTQGFVSLFYCFLNSEVRNALRHHISTWRDTRTIQLNQNRRTTKSFSKG  
GGSPRAESMRPLTSYYGRGKRESCVSSATTTLVGQHAPLSLHRGSNNALHTMPTLAANAMSSGSTLSVMPRASPLMRQ  
GLEENSV

>DmelCRF/DHR2-CG12370

MADDDLRLALVDSLDDASQEDLAKVIANFSVDMLQRASALIGAQQGSSGGQLQNRTLQCCQQQQREEEQASLEALASGG  
KRILQCPSSFDSVLCWPRTNAGSLAVLPCFEFVKGVHYDNTNATRFNCPNGTWDHYSDYDRCHQNSGSIPVVPDFSPNVE

LP A I I Y A G G Y F L S F A T L V V A L I I F L S F K D L R C L R N T I H A N L F L T Y I T S A L L W I L T L F L Q V I T T E S S Q A G C I T L V I M F Q Y F Y L T N F F W M  
F V E G L Y L Y T L V V Q T F S S D N I S F I I Y A L I G W G C P A V C I L V W S I A K A F A P H L E N E H F N G L E I D C A W M R E S H I D W I F K V P A S L A L L V  
N L V F L I R I M W V L I T K L R S A H T L E T R Q Y Y K A S K A L L V L I P L F G I T Y L L V L T G P E Q G I S R N L F E A I R A F L I S T Q G F F V A L F Y C F L N S E V R  
Q T L R H G F T R W R E S R N I H R N S S I K N R R H R A S K D Y S L R S R T E S L R L T S T S P I P T G H Y E

>DmelGlutR

M K Q K N N N G T I L V V M V L S W S R V V D L K S P S N T H T Q D S V S V S L P G D I I L G G L F P V H E K G E G A P C G P K V Y N R G V Q R L E A M L Y  
A I D R V N N D P N I L P G I T I G V H I L D T C S R D T Y A L N Q S L Q F V R A S L N N L D T S G Y E C A D G S S P Q L R K N A S S G P V F G V I G G S Y S S V S L  
Q V A N L L R L F H I P Q V S P A S T A K T L S D K T R F D L F A R T V P P D T F Q S V A L V D I L K N F N W S Y V S T I H S E G S Y G E Y G I E A L H K E A T E R N V  
C I A V A E K V P S A A D D K V F D S I S K L Q K K P N A R G V V L F T R A E D A R R I L Q A A K R A N L S Q P F H W I A S D G W G K Q Q K L L E G L E D I A E G  
A I T V E L Q S E I I A D F D R Y M M Q L T P E T N Q R N P W F A E Y W E D T F N C V L T S L S V K P D T S N S A N S T D N K I G V K A K T E C D D S Y R L S E K  
V G Y E Q E S K T Q F V V D A V Y A F A Y A L H N L H N D R C N T Q S D Q T T E T R K H L Q S E S V W Y R K I S T D T K S Q A C P D M A N Y D G K E F Y N N Y  
L L N V S F I D L A G S E V K F D R Q G D L A R Y D I L N Y Q R Q E N S S G Y Q Y K V I G K W F N G L Q L N S E T V V W N K E T E Q P T S A C S L P C E V G M I  
K K Q Q G D T C C W I C D S C E S F E Y Y D E F T C K D C G P G L W P Y A D K L S C Y A L D I Q Y M K W N S L F A L I P M A I A I F G I A L T S I V I V L F A K N H  
D T P L V R A S G R E L S Y T L L F G I L V C Y C N T F A L I A K P T I G S C V L Q R F G I G V G F S I I Y S A L L T K T N R I S R I F H S A S K S A Q R L K Y I S P Q S Q V V I  
T T S L I A I Q V L I T M I W M V V E P P G T R F Y Y P D R R E V I L K C K I Q D M S F L S Q L Y N M I L I T I C T I Y A I K T R K I P E N F N E S K F I G F T M Y T T C I I  
W L A F V P I Y F G T G N S Y E V Q T T T L C I S I S L S A S V A L V C L Y S P K V Y I L V F H P D K N V R K L T M N S T V Y R R S A A V A Q G A P T S S G Y S R T H  
A P G T S A L T G G A V G T N A S S T L P T Q N S P H L D E A S A Q T N V A H K T N G E F L P E V G E R V E P I C H I V N K

=====

Nuclear receptor sequences

>DmelHR51

M A T G R S L L F R V P W Y V C L C V C A E S A E P G V Y W R L R L R L G L P T L A G P H T N T L T A R T S S C R S I K K E R I K A S Q Q A N A P P E L P L K V S  
V D V N I I I A A H S Q R R R I G L V R F H Q R E S E D R P L A V A S P R L Q I N M E P T A M N P K K L H S P Q R H C Y T P P P A P M H G Q A P P P T S T G V A P  
P T Q P P P P H A A P N V P N G R L L S W N H S A A A A A A A A A A Q A A A N S M N H S S A A E G S S M T R I K G Q N L G I C V V C G D T S S G K H Y G  
I L A C N G C S G F F K R S V R R K L I Y R C Q A G T G R C V V D K A H R N Q C Q A C R L K K C L Q M G M N K D D D S I D V T N D N E P H A V S R S D S S F I  
M P Q F M S P N L Y T H Q H E T V Y E T S A R L L F M A V K W A K N L P S F A R L S F R D Q V I L L E E S W S E L F L L N A I Q W C I P L D P T G C A L F S V A E  
H C N N L E N N A N G D T C I T K E E L A A D V R T L H E I F C K Y K A V L V D P A E F A C L K A I V L F R P E T R G L K D P A Q I E N L Q D Q A H H T K T Q F T A  
Q I A R F G R L L L M L P L L R M I S S H K I E S I Y F Q R T I G N T P M E K V L C D M Y K N

>DmelII

M Q S S E G S P D M M D Q K Y N S V R L S P A A S S R I L Y H V P C K V C R D H S S G K H Y G I Y A C D G C A G F F K R S I R R S R Q Y V C K S Q K G L C V V  
D K T H R N Q C R A C R L R K C F E V G M N K D A V Q H E R G P R N S T L R R H M A M Y K D A M M G A G E M P Q I P A E I L M N T A A L T G F P G V P  
M P M P G L P Q R A G H P A H M A A F Q P P P S A A A V L D L S V P R V P H P V H Q G H H G F F S P T A A Y M N A L A T R A L P P T P P L M A A E H I  
K E T A A E H L F K N V N W I K S V R A F T E L P M P D Q L L L L E E S W K E F F I L A M A Q Y L M P M N F A Q L L F V Y E S E N A N R E I M G M V T R E V H A  
F Q E V L N Q L C H L N I D S T E Y E C L R A I S L F R K S P P S A S T E D L A N S S I L T G S G S P N S S A S A E S R G L L E S G K V A A M H N D A R S A L H N Y I  
Q R T H P S Q P M R F Q T L L G V V Q L M H K V S S F T I E E L F F R K T I G D I T I V R L I S D M Y S Q R K I

>Dmel dsf

M G T A G D R L L D I P C K V C G D R S S G K H Y G I Y S C D G C S G F F K R S I H R N R I Y T C K A T G D L K G R C P V D K T H R N Q C R A C R L A K C F Q S A  
M N K D A V Q H E R G P R K P K L H P Q L H H H H H A A A A A A A H H A A A H H H H H H H A H A A A A H H A A V A A A A S G L H H H H H  
A M P V S L V T N V S A S F N Y T Q H I S T H P P A P A A P P S G F H L T A S G A Q Q G P A P P A G H L H H G G A G H Q H A T A F H H P G H G H A L P A P H  
G G V I S N P G G N S S A I S G S G P G S T L P F P S H L L H H N L I A E A S K L P G I T A T A V A A V S S T S T P Y A S A A Q A S S P S N N H N Y S P S P S N  
S I Q S I S S I G S R S G G G E E G L S L G S E S P R V N V E T E T P S P S N S P L S A G S I S P A P T L T T S S G S P Q H R Q M S R H S L S E A T T P P S H A S L M I  
C A S N N N N N N N N N N N N N G E H K Q S S Y T S G S P T P T P P P P R S G V G S T C N T A S S S G F L E L L S P D K C Q E L I Q Y Q V Q H N T L  
L F P Q Q L L D S R L L S W E M L Q E T T A R L L F M A V R W V K L M P F Q T L S K N D Q H L L L Q E S W K E L F L L N L A Q W T I P L D L T P I L E S P L I R E  
R V L Q D E A T Q T E M K T I Q E I L C R F R Q I T P D G S E V G C M K A I A L F A P E T A G L C D V Q P V E M L Q D Q A Q C I L S D H V R L R Y P R Q A T R F G  
R L L L L L P S L R T I R A A T I E A L F F K E T I G N V P I A R L L R D M Y T M E P A Q V D K

>DmelHR78

M D G V K V E T F I K S E E N R A M P L I G G S A S G G T P L P G G V G M G A G A S A T S V E L C L V C G D R A S G R H Y G A I S C E G C K G F F K R S I R  
K Q L G Y Q C R G A M N C E V T K H R N R C Q F C R L Q K C L A S G M R S D S V Q H E R K P I V D R K E G I I A A G G S S T S G G N S S T Y L S G K S G  
Y Q Q G R G K G H S V K A E S A A T P P V H S A P A T A F N L N E N I F P M G L N F A E L T Q T L M F A T Q Q Q Q Q Q H Q Q S G S Y S P D I P K A D P  
E D E D D S M D N S S T L C L Q L L A N S A S N N N S Q H L N F N A G E A P T A L P T T S T M G L I Q S S L D M R V I H K G L Q I L Q P I Q N Q L E R N G N L  
S V K P E C D S E A E D S G T E D A V D A E L H M E L D F E C G G N R S G G S D F A I N E A V F E Q D L L T D V Q C A F H V Q P P T L V H S Y L N I H Y V C E T  
G S R I I F L T I H T L R K V P V F E Q L E A H T Q V K L L R G V W P A L M A I A L A Q C Q G Q L S V P T I I G Q F I Q S T R Q L A D I D K I E P L K I S K M A N L T R T  
L H D F V Q E L Q S L D V T D M E F G L L R L I L L F N P T L L Q R K E R S L R G Y V R R V Q L Y A L S S L R R Q G G I G G G E E R F N V L V A R L L P L S S L D A E  
A M E E L F F A N L V G Q M Q M D A L I P F I L M T S N T S G L

>Dmmelusp

MDNCDQDASFRLSHIKEEVKPDISQLNDSNNSFSFPAESPVPFMQAMSMVHVLPGSNSASSNNNSAGDAQMAQAPNS  
AGGSAAAAVQQQYPPNHPLSGSKHLCISCGDRASGKHVYVYCEGCKGFFKRTVRKDLTYACRENRCIIDKRQRNRCQY  
CRYQKCLTCGMKREAVQEERQRGARNAAGRLSASGGGSSGPGSVGGSSSSQGGGGGGVSGGMGSGNGSDDFMTNSV  
SRDFSIERIEAEQRAETQCGRALTLFRVGPYSTVQPDYKGAVSALCQVNVNQLFQMVEYARMMMPHFAQVPLDDQVILLK  
AAWIELLIANVAWCSIVSLDDGGAGGGGGGLGHDGSFERRSPGLQPQQLFLNQSFYHRNSAIKAGVSAIFDRILSELSVK  
MKRLNDRRELSCLKAIIYNPDIRGIKSRAEIEMCREKVYAACLDEHCRLEHPGDDGRFAQLLLRLPALRSISLKCQDHLFLFRIT  
SDRPLEELFLEQLEAPPPGLAMKLE

>DmelKni

MVFNLMNQTCKVCGEPAAGFHFGAFTCEGCKSFFGRSYNNISTISECKNEGKCIIDKKNRRTCKACRLRKCYNVGMMSKGGG  
RYGRRSNWFKIHCLLQEQHEQAAAAAGKAPPLAGGVSVGGAPSASSPVGSPHTPGFGDMAAHLHHHHQQQQQQVPR  
HPHMPPLGYPYLSYSDPSAALPFFSMMGGVPHQSPFQLPPHLLFPGYHASAAAAAASAADAAYRQEMYKHRQSVDSVESQ  
NRFSPASQPPVVQPTSSARQSPIDVCEEDVHSHVSHQSSASLLHPAIRATPTTPTSSSPLSFAAKMQSLSPVSVCSIGGETT  
SVVPVHPPTVSAQEGPMDLSMKTSSRSSHVFNDSGSEDQEVAVPRRKYQLEAECLTTSSSSSSSHAAHSPNTTTAHAEV  
KRQKLGAEATHFGGFAVAHNAASAMRGIFVCV

>DmelKnrl

MMNQDNPYAMNQTCKVCGEPAAGFHFGAFTCEGCKSFFGRSYNNLSSISDCKNNGECIINKNRRTACKACRLKCLMVG  
MSKSGSRYGRRSNWFKIHCLLQEQQQAVALMAAAHNSQQAGGGSSGGSGGGQGMPPNGVKGMGSGVPPAAAAAAA  
LGMLGHPGGYPGLYAVANAGSSRSKEELMMLGLDGSVEYEGSHKHPVVASPSVSSPDSHNSDSSVEVSSVRGNPLHLG  
GKSNSGGSSSGADGSHSGGGGGGGGGVTPGRPPQMRKDLSPFLPLPFPGLASMPVMPPPAFLPPSHLLFPGYHPALYSH  
HQGLLKPTPEQQAAVAAAAVQHLFNSSGAGQRFAPGTSFANHQHHEEDQPAPARSPSTHANNNHLLTNGGAAD  
ELTKRFYLDVAVLSQQQSPPTTKLPPHSKQDYSSALVTPNSESGRERVKSRQNEEDDEARADGIIDGAEHDDEEEDLVVS  
MTPPHSPAQQEERTPAGEDPRPSPGQDNPIDLSMKTGSSLSKSSSPEIEPETEISSDVEKNDTDDDDDELKVTPEEEISVR  
ETADPEIEEDHSSTTETAKTSIENTHNNNNNSISNNNNNNNNNNNSILSDSEASETIKRKLDELIEASSENGKRLRLEAPVKVAT  
SNALDLTTKV

>Dmelea

MNQLCKVCGEPAAGFHFGAFTCEGCKSFFGRSYNNIAAAGCKHNGDCVINKNRRTACKACRLKCLLVGMMSKSGSRYGR  
RSNWFKIHCLLQEQTTSLGGGSSVSGSGGGVSSASLEQLARLQQASNQARQTYQDKTNPICISATATTSPRIEGA  
GTGIGGGASPSFLQAAKLHHQRQLKLDRLSNTPSDSGASSAGDPNEDGVTSLVGGQIATPSSTNATSLPKDLRHPNFPAT  
SEPDAQMQRQRHQELLEIFRSHSEPLYSSFAPFSLPVLAAAGVPLPIFKDQFKAELLFPTTSSPELEPIDLSFRSRADPAS  
PMAHNSNSPSLSEPAASHCLGESTNFVRKSTPLDLTLVRSQTLTG

>DmeIE75B

MEAVQAAAAATSSGGSSGVPVSGSGSASKLIKTEPIDFEMLHLEENERQQDIERPSSNSNSNSNSLTPQRYTHVQVQT  
VPPRQPTGLTTPGGTQKVILTPRVEYVQQRATSSTGGGMKHVYSQQQGTAAARSAPPETTALLTTSTGTPQIIITRTPSNQ  
HLSRRHSASPSALHHYQQQPQRQSPPLHHQQQQQQHVRVIRDGRLYDEATVVVAARRHSVSPPLHHHSRSAPV  
SPVIARRGAAAYMDQYQQRQTPPLAPPPPPPPPPPPPPPPPPPPPPPPPPPPPPPPPPPPPPPPPPPPPPPPPPPPPP  
HFQQQQQQHQAQQHQQHQQHQQHQQHVIASVSSSSSSAIGSGSSSSSHIFRTPVSSSSSSNMHHQQQQQQQQS  
SLGNSVMRPPPPPPPKVKHASSSSGNSSSSNTNNSSSSSNGEPPSSIPDLEFDGTTVLCRVCQKASGFHYGVHSCGC  
KGFRRSIQKIQYRPTKNQCSILRINRNCQYCRLLKCIAVGMSRDAVFRGRVPKREKARILAAMQQSTQNRGQQRAL  
ATELDDQPRLLAAVLAHLETCEFTKEKVSAMRQRARDPCPSYSMPTLLACPLNPAPQLSEQEFQFAHVIRGVIDFAGMI  
PGFQLLTQDDKFTLLKAGLFDALFVRLICMFDSSINSIICLNGQVMRRDAIQNGANARFLVDSTFNFAERMNSMNLDAEIG  
LFCAIVLITPDRPGLRNLEIEKMYRSLKGLQYIVAQRNPDPQEFLLAKLLETMPDLRTLSTLHTEKLVFRTEHKELLRQQM  
WSMEDGNNSDGQNKSPSGSWADAMDVEAAKSPLGSVSSTESADLDYGSPPSSQPQGVSLPSPPPQQQPSALASSAPLL  
AATLSGGCLRNRRANSNGSSGDSGAAEMDIVGSHAHLTQNGLTITPVRHQQQQQQQQIGILNNAHSRNLNGGHAMCQ  
QQQQHPQLHHHHTAGAARYRKLDSPTDSGIESGNEKNECKAVSSGSSSSCSPRSSVDDALDCSDAAANHNQVQHPQL  
SVVSVSPVRSPQSTSSHLKRQIVEDMPVLKRVLQAPPLYDTNSLMDEAYKPHKKFRALRHREFETAADASSSTSGSNSLS  
AGSPRQSPVNSVATPPPSAASAAAGNPAQSQLHMHLTRSSPKASMASSHSVLAKSLMAEPRMTPEQMCRSDIIQNYLK  
RENSTAASSTTNGVGNRSPSSSTPPPSAVQNRQQRWSSSSVITTTCCQRQQSVSPHSNGSSSSSSSSSSSSSSSSSSSS  
SSASSCQYFQSPHSTSNGTAPASSSSGNSATPLLELQVDIADSAQPLNLSKKSPTPPPSKLHALVAAANAVQRYPTLSADV  
TVTASNGGPPSAAASPAPSSPPASVSGSPNPGLSAAVHKVMLEA

>DmeIE78C

MDVYQIELEEQAQIRSKLLVETCVKHSSEQQQLQVKQEDLIKDFTRDEEEQPSEEEAEEDNEEEDDEEEGEEEEDEEAL  
LPVVNFNANSDFNLHFFDTPEDSSTQGAYSEANSLESEEEEEKQTQQHQQQQHHRDLEDCLSAIEADPLQLLHCDDFYR  
TSALESVAASLSPQQQQQRQHTHQQQQQQQQQHPGQQQHQLNCTLSNGGGALYTISSVHQFGPASNHNTSSSSP

SSSAHSSPDSGCSSASSSGSSRSCGSSSSASSSSAVSSTISSGRSSNNSVNPAAATSSSSVAHLNKEQQQQPLPTTQLQQQQ  
QHQQQLQHPQQQSFGLADSSSSNGSSNNNGVSSKSFVPCVKCGDKASGYHYGVTSCGCKGFFRRSIQKQIEYRCLRD  
GKCLVIRLNRNRCQYCRFKKLSAGMSRDSVRYGRVPKRSRELNGAAASSAAAGAPASLNVDDSTSTLHPSHLQQQQQQ  
HLLQQQQQQQHQPQLQQHHLQQQPHVSGVRVKTPTSTPQTPQMCSIASSPSELGGCNSANNNNNNNNNSSSGNASG  
GSGVSVGVVVVGGHQQLVGGSMVGMAGMGTDHQAQVGMCHDGLAGTANELTVYDVMCVSQAHLNCSYTEELTREL  
MRRPVTVPQNGIASTVAESLEFQKIWLWQQFSARVTPGVQRIVEFAKRVPGFCDFTQDDQLILIKLGGFFVWLTHVARLIN  
EATLTLDDGAYLTRQQLEILYDSDFNALLNFANTLNAYGLSDTEIGLFSAMVLLASDRAGLSEPKVIGRARELVAEALRVQIL  
RSRAGSPQALQLMPALEAKIPELRSLGAKHFHSLDWLRMNWTKLRLPPLFAEIFDIPKADDEL

>DmelHR3

MASLLGSAPPAQILANQPIIVKIEPTQSFHIVDEGDTRVLSPLSDADKLGASWIDLKDIAGLQAGGGATLLDVCFEQANEDG  
TIIATVQPDLENELEAELKAEGEPEDETEPEPPAPKRLATTRPAQSRPQQQQQQQQQVFLSDPPALARSSSFSSLSFSSIS  
NISSVCKNMASTNSQEGSLKRTKERTPPPMPPLTTHKPAATTTATSATSAAAATSAATASATATSARENSREHSSSSSGSNG  
AMTAQIEIIPCKVCGDKSSGVHYGVITCEGCKGFFRRSQSSVVNYQCPRNKQCVVDRVNRNRCQYCRQLKCLKLGMSRDA  
VKFGRMSKKQREKVEDEVRFHRAQMRAQSDAAPDSSVYDTQTPSSDQLHNNYNSGGYSNNEVGYGSPYGYASVTP  
QQTMQYDISADYVDSTTYEPRSTIIDPEFISHADGDINDVLIKTLAEAHANTNTKLEAVHDMFRKQPDVSRILYYKNLGOEEL  
WLDCAEKLQMIQNIIEFAKLIPGFMRLSQDDQILLKTGSFELAIVRMSRLLDLSQNAVLYGDVMLPQEAFTSDSEEMRL  
VSRIFQAKSIAELKLTETELALYQSLVLLWPERNGVRGNTIEIQLFNLMSNAIRQELETNHAPLKGDVTVLDTLLNIPNFRD  
ISILHMESLSKFLQHPNVVFPALYKELFSIDSQQDLT

>DmelEcR

MLTTSGQQQSKQLSTLPSHILLQQQLAASAGPSSSVSLPSSSAALTLHVASANGGARETTSAAVKDKLRPTPTAIKIEPM  
PDVISVGTAVAGSSVATVVAPAAATTSNKNPSTAAPSTSAANGHLVLPNKRPRLDVTEWDMSTSPGSPVSSAPPLSP  
SPGSQNHNSYMSNGYASPMASGYDYPSTGKTGRDDLSPSSSLNGYSANESCDAKKSKKGPAPRVQEELCLVCGDRASG  
YHYNALTCEGCKGFFRRSVTKSAVYCKFRACEMDMYMRKQCERLKKCLAVGMRPECVPENQCAMKRREKKAQK  
EKDKMTTSPSSQHGGNGSLASGGGQDFVKEILDLMTCPEPPQHATIPLLPDEILAKCQARNIPSLTYNQLAVIYKLIWYQDG  
YEQPSEEDLRRIMSQPDENESQTDVSRHITEITILTQVLIQVFAKGLPAFTKIPQEDQITLLKACSSEVMMLRMARRYDHSSD  
SIFFANNRSYTRDSYK MAGMADNIEDLLHFCRQMFSMKVDNVEYALLTAIMIFSDRPGLEKAQLVEAIQSYIIDTLRIYILNR  
HCGDSMSLVFYAKLLSILTELRTLGNQNAEMCFSLKLNKRKLPKFLIIEWDVHAIPPSVQSHLQITQEENERLERAERMRAV  
GGAITAGIDCDSASTSAAAAAAHQHPQPQPQPSSLTQNDQSQHTQPLQPLPPQLQGLQPLQPLQPLQPLQPLQPLQPLQ  
QPQPQLLVPASVPASVTAPGSLSAVSTSEYMGGSAAIGPITPATTSSITAAVTASSTTSAVPMGNVGVGVGVGGNV  
MYANAQTAMALMGVALHSHQEQLIGGVAVKSEHSTTA

>DmelHR96

MSPPKNCAVCGDKALGYNFNAVTCESCKAFFRRNALAKKQFTCPFNQNCITVVTRRFQKCRRLKCLDIGMKSENIMSEE  
DKLIKRRKIETNRAKRRLMENGTDACDADGGEERDHPKADSSSSNLDHYSQSQSCGSADSGANGCSGRQASSPGT  
QVNPLQMTAEKIVDQIVSDPDRASQAINRLMRTQKEAISVMEKVISSQKDALRLVSHLIDYPGDALKIISKFMNSPFPALTVF  
TKFMSPTDGVIEISKIVDSPADVVEFMQNLMSHSPEDAIDIMNKFMTNPAEALRILNRLSSGGANAAQQTADRKPLDKE  
PAVKPAAPAERADTVIQSMLGNPSPHDAAVDLQYHSPGVGEQSTSSSHPLPYIANSPDFDLKTFMQTNYNDEPSLDS  
DFSINSIESVLSEVIRIEYQAFNSIQQAASRVKEEMSYGTQSTYGGCNSAANNSQPHLQQPICAPSTQQLDRELNEAEQMKL  
RELRLASEALYDPVEDLSALMMGDDRIKPDTRHNPKLLQILNLTAVAIKRLIKMAKKITAFRDMCQEDQVALLKGGCTE  
MMIMRSVMYIYDDRAAWKVPHTKENMGNIRTDLLKFAEGNIYEEHQFITTFDEKWRMDENIILMCAIVLFTSARSRVIH  
KDVRLEQNSYYYLLRRYLESVYSGCEARNAFIKLIQKISDVERLNKFIINVYLVNPSQVEPLLREIFDLKNH

>DmelHNF4

MMKHPQDLSVTDDQQLMKVNKVEKMEQELHDPESESHIMHADALASAYPAASQPHSPIGLALSPNGGGLGLSNSSNQ  
SENFALCNGNGNAGSAGGGSASSGSSNNNSMFPNNNLSGSGSGTNSQQQLQQQQQQQSPVCAICGDRATGKHYG  
ASSCDGCKGFFRRSVRKNHQYTCRFARNCVVDKDKRNQCRCRRLKCFKAGMKKEAVQNERDRISCRRTSNDPDPGNG  
LSVISLVKAENESRQSKAGAAMEPNINEDLSNKQFASINDVCESMKQQLLTLVEWAKQIPAFNELQLDDQVALLRAHAGEH  
LLLGLSRRSMHLKDVLLSNNCVITRHCPDPLVSPNLDISRIGARIIDELVTVMKDVGIDDTEFACIKALVFFDPNAKGLNEPH  
RIKSLRHQILNLEDYISDRQYESRGRFGEILLIPVLQSITWQMIEQIQFAKIFGVAHIDSLLEMLLGGELADNPLPLSPNQ  
SNDYQSPHTGNMEGGNQVNSLDSLATS GGPGSHSLDLEVQHIQALIEANSADDSFRAYAASTAAAAAAVSSSSSAPA  
SVAPASISPLNSPKSQHQHQQHATHQQQEQESSYLDMPVKHYNGSRSGPLPTQHSPQRMHPYQRAVASPVEVSSGGGG  
LGLRNPADITLNEYNRSEGSSAEELLRRTPLKIRAPEMLTAPAGYGTPECRMTLKQEPETGY

>DmelHR83

MSNFACAVCGDQSSGKHYGVSCCDGCSCFFKRSVRRGSSYACIALVGNVCVVDKARRNWCPSRCFRCLAVGMNAAV  
QEERGPRNQVALYRTGRRQAPPSQAAPSPTPHSQALHFQILAQILVTCLRQAKANEQFALLDRCQQDAIFQVVWSEIFVL

RASHWSLDISAMIDGCGDEQLKRLICEAHQLRADVLELNFMESLILCRKELAINAEYAVILGSHSKAALISLARYTLQQSNYLR  
FGQLLLGLRQLCLRRFDCALSCMFRSVVRDILKTL

>Dmelsvp

MCASPSTAPGFFNPRPQSGAELSAFDIGLSRSMGLGVPPhSAWHEPPASLGGHLHAASAGPGTTTGSVATGGGGTTPSSV  
ASQQSAVIKQDLSCPSLNQAGSGHHPGKEDLSSSLPSANGGSAGGHHSAGSGSGSGSVNPGHGSMDMLPLIKGHGQDML  
TSIKGQPTGCGSTTPSSQANSSHSQSSNSGSQIDSKQNIIECVVCGDKSSGKHGQFTCEGCKSFFKRSVRRNLTYSCRGRN  
CPIDQHHRNQCYCRLKKCLKMGMRRREAVQRGRVPPTQPGLAGMHGQYQIANGDPMGIAGFNHGSYLSSYISLLLRAEP  
YPTSRYGQCMQPNNIMGIDNICELAAARLLFAVEWAKNIPFFPELQVTDQVALLRLVWSELVFNASQCSMPLHVAPLLAA  
AGLHASPMAADRVAFMDFHIFQEQVEKALKALHVDSEAESCLKAIVLFITGKLLDILYKDVPALLTKVSALLGKGSTASND  
VLAVVRDHLDELNRQEQESQAQQQAPLHLAAFMNCVAGVEAAVQQAQVPTSSASASVSAPLVSAGSAFSSCQAK  
SAGSEMDLLASLYAQAATPPSSGGGDASGHNNSSGLGASLPTQSQSGSSRNLTASPLSTSLATAPAPASAPAPVPTSS  
VAQVPVPAPVPVPTSSASSSSLGGGAYQTPSAAAAAAMFHYQTPPRAAFGSAFDMFHHSTPFGVGVGHAHALAHSSGS  
GSASFGPSYRYPYSLAGSRWQL

>DmelERR

MSDGVSLHIKQEVDTPSASCFSPSSKSTATQSGTNGLKSSPSVSPERQLCSSTTSLCDLHNVSLSDGDSLKSGTSGGNG  
GGGGGGTSGGNATNASAGAGSGSVRDELRRCLVCGDVASGFHYGVASCEACKAFFKRTIQGNIEYTCPANNECEINKRR  
RKACQACRFQKCLLMGMLKEGVRLDRVRGGRQKYRRNPVNSYQTMQLLYQSNTTSLCDVKILEVLNSYEPDALSQVTPP  
PQVHTTSITNDEASSSSGSIKLESSVVTNPGTCIFQNNNNNDPNEILSVLSDIYDKELVSVIGWAKQIPGFIDLPLNDQMKLLQ  
VSWAEILTQLTFRSLPFNGKLCFATDVWMDHLAKECGYTEFYHCVQIAQRMERISPRREEYLLKALLLANCDILLDDQS  
SLRAFRDITLNSLNDVVYLLRHSSAVSHQQQLLLLLPSLRQADDILRRFWRGIARDEVITMKKLFLEMLEPLAR

>DmelHR38

MMRDLASLIVVKQEGGSNTSISHQATAIKCEASLYTESSLFQEINNNSCYRQNLNAPTHQQSHTSHLQHAQQHQTHQ  
QHPLLPPLPTLPLIYPCRNLPDGCINHLACSSSNSNSNCNSDSNSTSSSPGNSHFFANGNTCAAALTPAPPATEPRKIKP  
LGAGKLVGKTDSNSDSNSNCDSRAAAAASATSATSATTLAATAAATAAAAEAGGAASAAAAAKISQVRLTNQATTSM  
LLLQPNSSFFSLSPFDNFSTQASTTTTTTASAAGHHQHNNHLLHQHNNQQQQQQQQQQQQQQQHEHLQQQ  
HQQQLVSPQQHLLKSETLSHEEDQLISNLTSSVSHSELSDFPSPSDNSLLSPTTSGYPDNPAEDLTSSIENLTKLCLR  
DKRLSSIPEQQLSSEQQQLCLLSLRSSDPAIALHAQQQQQQQQQQQQQQQQQQHQQQQHLQLQLISPIGGPLSCGSSL  
PSFQETYSKYNSSSGSSPQASSSTAAPTPTDQVLTLMKDEDCFPPLSGGWSASPPAPSQLQLHTLQSQAQMSHPNS  
SNSSNNAGNSHNSGGYNYHGFNAINASANLSPSSASSLYEYNGVSAADNFYQQQQQQQQSYQQHNYNSHNGE  
RYSLPTFTISELAAATAAVEAAAAATVSSPSVGGPPPVRASLPVQRTVSPAGSTAQSPKLAKITLNQRHSHAHALQLN  
SAPNSAASSPASADLQAGRLLQAPSQCAVCGDTAACQHYGVRTCEGCKGFFKRTVQKGSKYVCLADKNCPVDKRRRNR  
QCFRFQKCLVGMVKEVVRTDSLKGRRGRLPSKPKSPQESPPSPISLITALVRSHVDTPDPSCLDYSHYEEQSMSEADKV  
QQFYQLLTSSVDVIKQFAEKIPGYFDLLPEDQELLFQASLELFLRLAYRARIDDTKLIFCNGTVLHRTQCLRSFGEWLNDIM  
EFSRSLHNLEIDISAFACALTLITERHGLREPCKVEQLQMKIIGSLRDHVTYNAEAQKKQHYFSRLLGKPELRSLSVQGLQR  
IFYLKLEDLVPAPALIENMFVTTLPF

>DmelFtz

MDTFNVPMLAESSNTNYATEATSNHHHLQHQQHQQHSHQQQQQQLLMPHHHKDQMLAAGSSPMLPFYSHLQLQQ  
KDATATIGPAAAAAAVEAATTSANADNFSSLQIDASQLDGGISLSGLCDRFFVASPNPHSNSNMTLMGTATAATTTTTNN  
NNNNNTNNNNNNNVEAKTVRPSNGNSVHIESVTMPSFANILFPTHRANECIDPALLQKNPQNPNGNSSIIVPPVEYHQL  
KPLEVNSSTSVSTSNFLSSTTAQLLDFEVQVGKDDGHISTTTTTGPGSGSASGSGSGSGSGSARTIGTATPTTTTTSMSNT  
ANPTRSSLHSIEELAASSCAPRAASPNSNHTSSASTTPQQQQQQQHMQSGNHSGSNLSSDDESMSEDEFGLIEDDNGG  
YQDTTSSHSQQSGGGGGGGGGNLLNGSSGGSSAGGGYMLLPQAASSSGNNGNPNAGHMSSGSGVNGSGGAGNGGA  
GGNSGPGNPMGGTSATPGHGGEVIDFKHLFEELCPVCGDKVSGYHYGLLTCECKGFFKRTVQNKKVYTCVAERSCHIDKT  
QRKRCPCYRFQKCLEVGMKLEAVRADRMGRGRNKFPMYKRDRARKLQVMRQRQLALQALRNSMGPDIKPTPISPGYQ  
QAYPNMNIKQEIQIPQVSSLTQSPDSSPPIAIALGQVNASTGGVIATPMNAGTGGSGGGGLNGPSSVGNNGNSSNGSSNG  
NNNSSTGNGTSGGGGGNAGGGGGGTNSNDGLHRNGGNGNSSCHEAGIGSLQNTADSKLCFDSGTHPSSTADALIEPL  
RVSPMIREFVQSIDDREWQTLFALLQKQTYNQVEVDLFELMCKVLDQNLFSQVDWARNTVFFKDLKVDQMKLLQHS  
WSDMLVLDHLHHRHNGLPDETQLNNGQVFNLMGLLGVLPQLGDYFNELQNKLQDLKDFDMGDYVCMKFLILLNPSVR  
GIVNRKTVSEGHNDVQAALLDYTLTCYPSVNDKFRGLVNILPEIHAMAVRGEDHLYTKHCAGSAPTQTLMEMLHAKRKG

>DmelHR39

MPNMSSIKAQQSGPLGGSSGYQVPVNMCTTTVANTTTTTLGSSAGGATGSRHNVSVTNIKCELDELSPNGNMVPIAN  
YVHGLRIPLSGHNSHRESDEEELASIEENLKVRRRTAADKNGPRPMSWEGELSDTEVNGGEELMEMEPTIKSEVPAVAP  
PQPVCALQPIKTELENIAGEMQIQEKYQSNQTHHAATKLVAPTQSDPINLKFEPPLGDNPLLAARSKSSSGGHLPLPT  
NPSPDSAIHSVYTHSSPSQSPLTSRHAPYTPSLSRNNSDASHSSCYSYSSEFSPHSPHPIARHAPPAGTYGNHHGIYRQMKV



EASSTVPSSGQEAQNLSMDSASSNLDTVGLGSSHPASPAGISRQQLINSPCICGDKISGFHYGIFSCESCCKGFFKRTVQNRK  
NYVCVRGGPCQVSISTRKKCPACRFKCLQKGMKLEAIREDRTRGGRSTYQCSYTLPNMMLSPLLSPDQAAAAAAAAAAVAS  
QQQPHQLHQLNGFGGVPICSTSLPASPLAGTSVKSEEMAETGKQSLRTGVSPLLQEIMDVEHLWQYTDALARINQ  
PLSAFASGSSSSSSSSSGTSSGAHAQLTNPLLASAGLSSNGENANPDLIAHLCNVADHRLYKIVKWCKSLPLFKNISIDDQICLLI  
NSWCELLFSCCFRSIDTPGEIKMSQGRKITLSQAKSNGLQVSLCEL

>DmeIHR4

MTPLQRDQLNHQQFVHHYLSQPVNKIDSFDIKHIRKTQNPTTNPKFRTEDRFKTSSKSKITNPESGNTQLHFHLSETPDL  
SASTSLLPSAFVASSAALVNVTQAEEGQSSAGSHYTVHRGNDAGISFAALDFRIRRAAQMNAQQPLILEPGSKASSVVA  
AAELEAATTTAALATSSATEASAADSYPVQQNGGHEEQRLNGNHGCRREQPDDRTDQPEQLDQQDEPEPVKDVANKL  
TIKTPLNKTLKKCNSNGSLQMPHANNGSSININNRNNTNNTNNNNNSNNNNNAASNDVCDSSGLQSGNSNEQEPFANN  
DRHHHHYHHHHHHHHYHHHGGDKSEASGDVASSSSADPNSQVKDEPTAQDSQDNQAAGAAEAGGATAVAATCSPSKCN  
KCNSHNNNSNCNNNNNTISNNNNNTSSNTNTNSNSNNNANNNNNNNNNNNHNNNNNNYKKSRRMPPICRIMTLRSG  
PYSELDKMSLFQDLKLRKIDSRCSDDGESIADTSTSPDLLAPMSPKLCDSGSAGASLGASLPLPLALPLMALPLPMSLPL  
PLTAASSAVTVSLAAVVAVAETGGAGAGGAGTAVTASGAGPCVSTSTTAAATSTSSSSSSSSSSSTSSSTSSASPTAG  
ASSTATCPASSSSSSGNGSGGKSGSIKQEHEIHSSSAISAAAATVMSPPPAEATRSSPATPEGGGPAGDGSAGTGGGNT  
SGGSTAGVAINEHQNNGNGSGGSSRASPDSEKPTTTTTGRPTLTPTNGVLSSASAGTGISTGSSAKLSEAGMSVIRSVK  
EERLLNVSSKMLVFHQREKETKAVAAAAAAGHVTVLVTPSRIKSEPPPPASPSSTSTQREERERDRERDRERERER  
DRDREREREQSISSSQHLSRVSASPPTQLSHGSLGNIVQTHHLHQQLTQPLTLRKSSPTEHLLSQSMQHLLTQQQAIHLH  
HLLGQQQQQQQASHPQQQQQQHSPHSLVRVKEPNVGRHLSPHHQQQSPLLQHHQQQQQQQQQQQQLHQQ  
QQQQQHQQQPQALALMHPASLALRNSNRDAAILFRVKSEVHQVAAGLPHLMQSAGGAAAAAAAAAVAAQRMVCF  
NARINGVKPEVIGGLGNLRPVGVGGNGSGSVQCPSPHPSSSSSSQLSPQTPSQTPPRGTPTVIMGESCGVRTMVWGY  
EPPPSAGQSHGQHPQQQQSPHHQPPQQQQQQQQQQSLGQQQHCLSSPSAGSLTPSSSSGGGS  
VSGGGVGGPLTPSSVAPQNNEEAAQLLLSLGQTRIQDMRSRPHFRTPHALNMERLWAGDYSQLPPGQLQALNLSAQQ  
QQWGSSNSTGLGGVGGMGGRNLEAPHEPTDEDEQLVCMICEDKATGLHYGIITCEGCKGFFKRTVQNRVYTCVAD  
GTCEITKAQRNRCQYCRFKKICIEQGMVLQAVREDRMPGGRNSGAVYNLYKVYKHKHKTNQKQQQAAQQQQQAA  
AQQQHQQQQHQHQHQHQHQQLHSPHLLHHHHHGHQSHHAQQQHHPQLSPHLLSPQQQLAAAVAAAAHQHQ  
QQQQQQQQQQQAKLMGGVDMKPMFLGPALKPELLQAPPMHSPAQQQQQQQQQQQQQASPHLSLSPHQQQ  
QQQQGQHQNHHQQQGGGGGAGGGAQLPPHLVNGTILKTALTNPSEIVHLRHRLDSAVSSSKDRQISYEHALGMIQTLI  
DCDAMEDIALPHFSEFLEDKSEISEKLCNIGDSIVHKLVSWTKKLPFYLEIPVEIHTKLLTDKWHEILITTAAYQALHGKRRGE  
GGGSRHGSPASTPLSTPTGTLSTPIPSAQLPHKDDPEFVSEVNSHLSTLQTCLTTLMGQPIAMEQLKLDVGHMVDKMT  
QITIMFRRIKLMEEYVCLKVYILLNKA EVELESIQERYVQVLRSYLQNSSPQNQPQARLSELLSHIPEIQAAASLLESKMFYVPF  
VLNSASIR

>Ph516230-ERR

MDLERRRGEYNMSGDGAPILAISHIKKEVDGSGFLACSPNTSSTSTNIYSPMKTELPNQMDYGNLQEMNCYDVTHSRSPES  
PDQQFCSSTTQFVGEASVNNAEGEIREDDLPRRLCLVCGDVASGFHYGVASCEACKAFFKRTIQGNIEYTCPAANDCEINKR  
RRKACQACRFQKCLRMGMLKEGVRLDRVRGGRQKYRRNTDTPYQIHSMLPLKPYLPSLEDNKILEALSLENEPDISVMAQDI  
SNADPAVRTLNILSDLYDQELVKIITWAKHIPGFLDLTNDQMRLQSTWAEILTLYRSLPGTGELKFAADFSFDEKMAR  
ECGAMDIYQHCMHIVERQEKLNITKEEYIICALVLANSDVRIDDLPLPKLRDNILSALADCVAVLRPNNTSLHMNHLLCLP  
ALRQADYINRRFWTAVHREGKVYMNKLFIEMLSEYIR

>Ph596250-dsf

MRINRDRLLDIPCKVCGDRSSGKHYGIYSCDGCSSGFFKRSIHRNRVYTCKAQGDLKGRCPIDKTHRNQCRACRLNKCFIAA  
MNKDAVQHERGPRKPKHNITSKENNHHHHHHHHPVLMHHSNPPLSNSAEQPSAKQPPPPPPPPGIVFPQPINPHMHY  
LQSPIKTSQELIPASENFVFNITPIPSGPPSAAAMFLAHQPPPPGLLQILMTAEKQELLWNTKLSTTERVGVPPSSPLALQPL  
SPSWEVLQETTARLLFTAVRWVRSGLPFQTLSRHDQLLLLQESWKELFLLYLAQWSIPWDLTLLNSSKARDRLPQDEITAN  
EIKTIQELIGRFRQLSPDLSECGCMKAVILFTPETAGLCDVQPVEMLQDQAQCILGDYIRNRYPRQPTRFGRLLLLILPNLSIRQ  
LTVEQLFFKETIGEIPQRLGDMYHME\*

>Ph494010-PNR

MDHKLEALCKVCGDKASGKHYGVISCDGCRGFFKRSIRRLAYHCKESNSCIVDVTRRNQCQACRFKCLSVNMKRDVAVQ  
HERSPRTSFPPIHCTGLSSTGRRNNNNNNNTYSYSGSFLTAATSGPFLDLPTYHFVYPQPSFPIHFDLSVSKQNVWDLTISSQ  
QGHPENVYESAAKLLFLTVKWARSIPSFLQLTFHDQSILLENTWNELFILSAAQWTLPVDEEYLVRVTSLPNNKAKEKFEREV  
KNFKKIITKFNNLNVDYTEYACLKALTLFKAETSELKDRQLQVEMLQDQTHIMLHDYCTSQDSHKARFGKLLMLLPSVNGLSK  
DFIEELLFRKTIGIYK\*

>Ph477600-HNF4

MVTESELQMGTQPGLQGSQNFNAPTGITQNCACGDRATGKHYGAASCDGCKGFFRRSVRKNHQYTCRFSRNCVVD  
KDKRNQCRYCRLKCFKAGMKKEAVQNERDRISCRPSYDETQNNGLSVTSLLEMLSRQQNGSPVNDYDLSNKQIA  
HINDICESMRQQLLILVEWAKYIPAFTELHDDQVALLRAHAGEHLLGLARRSLHLKDILLGNCCIITRYCSEENARSPDVIS  
RVGIRVMDELVKPLTEVQIDDTEFACLKAIVFFDPNAKGLSDTTRIKHLRYQIQINLEDYISDRQYDTRGRFGEILLIPALQSIT  
WQMIEQIQFAKLFVARIDNLLQEMLLGGKHLN\*

>Ph475840-Ftz

MRGGRNKFPMYKRDRARKLQMMRQRQIAVQTIRGHPLTDGQVAFSYGPPSHFENLHNIKQEIQIPQVSSLTSSPDSSPS  
PITVSGQTTSANMIATTQSGQPPVLQIVGTGGNPTSNNLVPSSDHKLWGTANSTTPSPNSISPKAFPFQDGVSLPHGSSGG  
PGNSSSSSCNKISPMIRDFISSVDDREWQNSLFGLLQNTYNQCEVDLDFELMCKVLDQNLFSQVDWARNSIFFKDLKVVDD  
QMKLLQHSWSDMLVLDHLHQRMHNNLPDETTLPNGQKFDLLCLGLLGVPTLADHFTDLTNKLDKFDVSDYICVKFLLL  
LNPVDRGISNRKHVQEGHEQVLQALLDYTLTIYPHIQDKFTKQQVLEIHMASRGEDHLYHKHCSGGAPTQTLMEML  
HAKRK\*

>Phknr1

MESESSPGIGSALGRWWGQSPQSSPSTDVMNQLCRVCGEPAAGFHGFAFTCEGCKSFFGRTYNNLGSITECKNNGECV  
INKKNRTACKACRLRKCLLVGMSKSGSRYGRRSNWFKIHCLLQEQQAAGAHPLKDKSSAIALWGESYKNLTPPHFDTDSK  
VSPTEESILLNNNNVTKDRERSNPVLPYSYAEAAAALWAARHSLFPMQLPHHPMPSIPMPFMPFFANFSPPTHSSQSQRN  
ILLPFMQTLNSSSSSSPVRPNHHPMMSSSSSSSSEGSICSQSPSPNRNNQRNDDVSPSTIRFTEKTETTVEKRSSLSS  
SSSPPSDKSPTNNNRLSAVNSIKVKNPPLLDNPIETNERVDDVASSKKIQTEEHLALLRSLGPVQDQPMDSLVRVIEIKSRR  
KSSKVNHRIAKNEYHHHRDDDKNNESSGEGDAVNDVKNVLDVLSIENNENFNKRKNPLDLTKSTKLEI\*

>Phknr2

MNQQCKVCGEPAAGFHGFAFTCEGCKSFFGRSYNNLNSITECKNNGECIINKKNRTACKSCRLRKCLLVGMSKSGSRYGRR  
SNWFKIHCLLQEQQAQAAVAQMKGKNPSTTNPLENPLPLLSPLAFPHNLGSLRPNSSSSPSDFYLPVFPFMSFMQPPPP  
MSSPFLPSPLLFPVPTKHNDYSQRLSPPDHVQNVHKNRCLTPEYDEENTRTDSPPSRQSPNTNNNNNDYSSKCNININD  
DNSDDNSFGKNKESDKEMMMTVRSKRFLDAILGLKTSSEKKIESVNEKKINDVINDDNDNDEIEKLIKRYDDEQDNPI  
DLSVKSSKFKKDFFTKENRRRKHVEEEEEEEENVVEEKKIFNNNNRDDVKPIPLDLTV

>PhEcR

MFRGGASAMKPIGNCEEDLVTQVKSEPRVHSPCEKDMTPSASSNQSNLSLSTISSSSKRPRTDWLSPPSPGPPMGSAPL  
TPSPGPHNQYTVISNGYSSPMSSGSYDPYSPNGKLGREDLSPGSLNGYSVDSSDSKKGPTPRQEECLVCGDRASGY  
HYNALTCGCKGFFRSITKNNAVYQCKYGDSCIDMYMRRKCQCRLKCLSVGMRPECVVEIQCEVKRREKKAQREKKG  
PSSTTNGSPELIMADTPAIKTEPNTTQSHNEKSSANGVKPISPEQEELIHLRVYFQNEYEQPSDEDLKRISNAPSEGEDQSDL  
NFRHITEITILTVQLIVEFAKRLPGFDKLLREDQIALLKACSEVMMLRMARRYDVGSDSILFANNQPYTRDSYSLAGMGETV  
DDLRFRCRQMYGMKVDNAEYALLTAIVIFSERPSLIEGWKVEKIQEIYLEALKVYVDNRRKPRSGTIFAKLLSVLTELRTLGNLN  
SEMCFSLKLNKLLPFLAEIWDVIP\*

>Ph460980-HR96

MNSRASSRELNDAERAKLNELIVANKALLAPLEDDLSGDDFGFNAMAGCGPSVLVDVNLTAVAIRRLIKMSKINAFK  
NMCQDDQIALLKGGCTEMMILRSAMTYDPRDSWKIPQSKEKLMNIKVDILKEAGGRVFEHQRFQTFDQKWRNDENI  
MLILSAIALFTPDRPRVHFDVIKLEQNSYYLLRRYLESVYQGCEARLTLFLKLIHKISELHKLNEHDHVRVYLDANPREIEPLIEIF  
DLKPH\*

>Ph411130-HR38

MPRGGFGNAMHVIWVWVAPFGSSTFAELLSAPYSEDVGGETLDPFPEVVFHSQPLSPAPLPSFQEIYSPRFPTRQTKSPELNN  
IGIKMDEYVVYHHHPSPAMPTTPIQSPYDFHSQHFSYQQPHHPNQGYESSGGPQDSYSLPHFPTSELHINTTLNLR  
QRRASLPLQRSESTNSSDSPKLRMGMMTGPPPSASSASSSPGCGVPETVAPSLPRPAPQSPSQLCAVCGDTAACQHYG  
VRTCEGCKGFFKRTVQKGSKYVCLADKSCPVDKRRRNRCQFCRFQKCLAVGMVKEVVRTSLKGRGRRLPSKPKSPQESPP  
SPPVSLITALVRAHVDTTPDLANLDFSQYREPIGEPPEMSEAELIQQFYSLTTSVDVIRHFADKIPGFTELTKEDQDQLLFQSAS  
LELFVLRLAYRTKADDTKLTFCNGVLDKHCQCRSFGDWLHAILDFCQSLHAMDIDISAFACLALTLITERHGLKDPHKVE  
QLQMKIIGSLRDHVTYNAEAQRKQHYFSRLLGKLELRSVQGLQRIFYLKLEDLVPAPPLIENMFVASFQKKKTKITRNEDE  
TREEPTESTAEIYLFILGR\*

>Ph331460-tII

MMMTMFTGRILYDIPCKVCQDHSSGKHYGIFACDGCAGFFKRSIRRSRQYLCKAKSEGSCVTDKTHRNQCRACRLKCKVE  
AGMNKDAVQHERGPRNSTLRRQMAFYFKEPCDTTSDIGCGPSVSPILQHSQTHVLDLALPKIPTSVSPRSESNGSPLMQPT  
MAAAFLFGQTLIPKLTNPFTLNAIPLGSVEALCESAARLLFMNVTWAKNVPAFTRLNYKDQLLLEESWRELFVLSASQFM  
LPELVDLLTAHTVTANSEKALTIAQEVKQFQETLIKFKQLHVDIHEYACLRAIVLFKTSFDPSNNTVTSSTAPSSSGEGKTLH  
DLAEVAAVQDHTQLTLNKYISAAHTQPFRFGKLLLLLPSLRVSNNTIEELFRRTIGNIPIERIICDMYKASD\*

>Ph318510-HR39

MDATATSTSWTQASASTRLASQNSPTKGVVSVVVDSRNEPNVFAVKEEHIVGHRGTSITCGGVTVTSINVPQNEEQDFSS  
QNVKNTLHFGANERAEIGIKCEPLSSNFNDDSDVHLRIKKRSNKNDEKSDILKIEEPERPMSWEGELSDTEMSIVTDGR  
RMRDDIKDELMSDVQMSPQSIKSEIGDAIIMESGRLKQEPETCNETMSGYSSSSRELPLLVDKLLGGYSTPSQSPILQQRQ  
QHSLTKQHSLGALPPNPSPDSAIHSAYSYSPAASPAASRHLPSGFSPPFTPSLSRNNSDASQYGGSQHSSCYSYNSNF  
SSPTHSPQRSRHLGLGYSKVDGSPHSVTGGQLDYQQQHLNDRDEEKDPCLEEKMSCLASDFSQHSALATPPGISRQQLINS  
PCPICSDKISGFHYGIFSCESCCKGFFKRTVQNRKNYVCLRGSQCPVTIATRKKCPACRFEKCLKMGMKLEAIREDRTRGGRST  
YQCSYVPSLLQNSDSIHKLSNSLTAGETLVKLETPHLGSPNSNLDLRLPVPQLLQEIIMDVEHLWHCNEREMLGSPMNN  
HRHSPSTPSSPSPSQSQTNSNPDLFSLNLCNIADHRLYKIVKWCKSLPLFKNISIDDQISLLINSWCELLFSCCFRSMSSPG  
EIRVSLGKSISLAKELGLGPCIERMLNFTQHLRRLRLDKYEVAMKVIVLLTSDVNDLREPEKVRASQEKALQALQHYTLAH  
YPDMPKSGFELLRIPELQRTCQVGKEMLSIKNREGGEPFNLMLLMDRGRDH\*

>Ph301950-HR78

MTAKYRSNDLEADIKMEQPPLNCAIKMEQPHLNYGIKMEQALDLNISSGLKVEQALDLNMSSNLKIEQAMDNLNMSDDKV  
RSLCLAVELCVCGDRASGRHYGAISCEGCKGFFKRSIRKQLGYQCRGTKNCEVTKHHRNRCQYRQLKCKLEKGMRSDSVQ  
HERKPISEKNSRDLSSLIASNNNSQPFLPTDINSKIYLRKDLENAPSAFAAAFLADLGLLTATTLGKSSCKFIEHLLIKYNMFV  
HLGNEIVKRESPHMSDEEDSAESDVNEESGDALSWAREKTLKESLDLLSKLLNENYNANESATEEDRKPLDCDESLQDYHS  
TFNLQTPSPVPVHLNVHYVCESACRLLFSIHWARSISAFQNLSHDLQVALVRRCWPELALGLSQCQILPLRAMLAPIIAYL  
RTAVTQDTMAAQRLLIDITHIFKLHEYVTRMVSQIDNHEYAYLKALVLSFWHLPLGLPLALKRQIDRLQEALQELKSYVAK  
NNSEEDNRSSKLLRLLPLRFLQPQIMEELFFAGLIGNVQIDSVIPYILRMEADEYRVSLLEQASQGFET\*

>Ph234430-Eip78C

MSRDSVRYGRVPKRSRERSTEEQSRVSTSDAEQSDSDTKQLAVYDVILTVSQAHHANCGYTEEHTRNLVRKPITIPPLNGSS  
STDGPEVASSTAESLEQERIWVWQQFASHVTPSVQRVVEFAKRVPGFCDLSQDDQLILIKVGFEEIWLGHVSRQTCDSMT  
FTDGTITKQQMDLIYDPEFVSSLFHFAASFALALNDTELGLFSAVLLSADRPGVADIKVIEQHQRDLIEALKVQVGRNHA  
SDPQLFSSLLMKLPELRNLGAKHSAHLDFRINWQLLRLPPLFAEIFDIPKCEEDLQ\*

>Ph233230-Eip75b

MAFIPAKVARNETMQENRFPNNEFQNLSDLEKKGASRTTSSSSSSGDEGDRSSSSSSDDEKCPHEFCNDYDYDVEDAV  
RFRGRVPKREKARILAAMQQSTNSRSQEKAVAAELEDQRLGTVIRAHLDTCDFTKDKIEPMIARAREQPSYACPTLACP  
LNPNPQPLSGQQELLQDFSKRFSPAIRGVVEFAKRIPGFSLLPQDDQVTLKAGVFEVLLVRLACMFDSQSNSMICLNGQVL  
KKESIHNSTNARFLMDSMFDAERINSLGSDAEIGLFCVSVVIAADRPGLRNTDLIERMHKLNLSLQAVVTQNHGHTDI  
CNELMKKIPDLRNLTLHSEKLLAFKMTQQQLQQQQLQQQEMWTEEEVHSKSPAGSSWSSSDVTMDEAVKSPLGS  
VSSTESVCSGEVAITDHQGGPASTAPLLAATLAGGICPHRHRANSSTSGDDDIMGSHLLQNGLTITAVNNPSKSYNQSH  
RFHRKLDSPSDSGIESGTEKIDKVTNSVNSAPTSLCSPRSSLEDKDEDKQHTHIVEDMPVLRVQLAPPLYDTNSLMDEAYK  
PHKKFRALRNKDSAEAEPMIIVSPVPSVNSSEHHSSTQLHRHLTATTSAPPSLTGSSLSSTHSTLAKSLMEGPRMTAEQVKR  
QEIIHNYIMRGDPPAEFNQSSSSSPAPRPNNNLLNCGGNWSQPQTGYHYLPTQPQPSRWHSNGASVITTSRPFSLTP  
NSTSSPPPVLQKALEQNAEFSRIYLPQSPHLLASSTSPSPIARNVSPSSCSPASRSPSVAGGPQMTLPSPKMMELQVDIA  
DSNQQLNLSKSPSPRPLSAPSTAVQKALTLEA\*

>Ph195250-HR4

MTLTRNPCELDTMSLFQDLKLRKRVDSRCSDDGESVAETSTSSPDMAGPPSPCKLTSPSEPETPRNRVRLSPEQPRIRSS  
PEQRIRLSPEHPRVTEQLKLRSLQSRIRLSPDQQPRVRLSPDQQPRLRLSPDQQPRVRLSPEQQRLSPLIQKGSPIQRS  
MSGGEQNTSGGVLMISPGAFVWNSAASGRINGVRPELIGGNVNMNFPVNSQNSDMKPPRPVSTPGTPTMTRQTPTVI  
MGEAGVVRTMIWSQPNPSSPADHQNQNAASTSAINWSTSPQSSAVIVVKNQRRNFYLISVNPPLNMRERLWAGDLT  
QLPVSQQNQALNLALPPGDWPRDGRPQGITIIGEPKHDPEDDEQPMICMICEDRATGLHYGIITCEGCKGFFKRTVQNR  
VYTCVADGNCEITKAQRNRCQYCRFKKICIEQGMVLQAVREDRMPGGRNSGAVYNYKVLNRERDNKFLNVIFNNNEKG  
NQKSSISSEQLTSPHIVNGTILKALTNPSEVVHLRQRLDNTVSSSRDRTPFLDTILNMIQALVDCDEFQDIATLRNLEDLLD  
HKSDLSEKLCQIGDSIVYKLVQWTKRPFYLELPEVHTRLLTHKWHELLVLTTSAYQAIHGVHKLSTSTAGQEAFTQEV  
NNLVTLQCLTSMGRPITMDQLRQDVGLMVEKITHVTLMFRRVKLRMEEYVCLKVITMLNQGRGGSNELEAIQDRYM  
MCLKSFVEHSFPQPARFHELLRLPEIQSAASLLESKMFYVFPFLNSAIQR\*

>Ph164330-usp

MMKKDKPMLSVAIIQGVQVQHSRGTNVMMLLSVELGGPQSPDMKPDATLLGGNFSPNGGPNPNSFTMGHS  
SLIGNNSNNKMASYPPNHPLSGSKHLCGDRASGKHGYSYCEGCKGFFKRTVRKDLTYACREERNCCIIDKRQRNRCQFC  
RYNKCLAMGMKREAVQEERQRTKEREQGEVESSGAMQADMPVERILEAEKRVECKVENQNEYENAVANICQATNTQLY  
QLVEWAKHIPHSSLPIDQVLLLRAGWNELIAAFSHRSVEVRDGIIVLGGAGITVHRNSAHQAGVGTIFDRVLTVELVAKMRD  
MNMDRTELGLRSIILFNPEVRGLKSGQEVLELREKVVAALEEYTRVTRPEEPGRFAKLLRLPALRSIGLKCLEHLFFRLIGDI  
PIDTFLMDMLGSSSDS\*

>Ph053030-HR3

MFDMWNSVSPKLETSQPGTTSNSQLPQTSTNAAGSIKAQIEIIPCKVCGDKSSGVHYGVITCEGCKGFFRRSQSSVVNYQC  
PRNKNCVDRVNRNRCQYCRLLQKCLRLGMSRDAVKFGRMSKKQREKVEDEVRFHRAQQROATESTPDSSVFDQQTTPSS  
SDQLHYNGYSYSSDVGSYTNYPHIIQYDISADYVDSTTAYDPRPGLDSLTAADSNLMTSVVTTGGNCHSGNNTVENQ  
SNQRINSLNNQTTGNDRTERNNGSNERTGLEGAQRQGLDRLVTVKQENVNDIIGGGGFVDSTLLQPMSPSSQASQNLSPR  
SQVSQMTMTSPSVKLKEEEDINQGCPSKMYPMQISELLSKTIADAHSRTCVCYVLEHIHEMFHKPQDLSKLIYYKNMAHEELWL  
ECAQKLTTVIQIIIEFAKMIPGFMKLSQDDQIVLLKAGSFELAVLRMSRYFDLSQNCVLYADTLLPQDAFFTTDTSEMKLVT  
VFEFAKSVAELKLTETELALYSVLLSGDRPGLKGTTEINRLRHAVARALRFEMDRNHILPLKGDVTVYDHIMAKIPALRELS  
LYHMDALAKFKRSTPLLEFPALHKELFSVDS\*

>Ph039420-HR51

MGSSPECCSAGSSPAHPLPLCLGCTPHHQTVVQAQRSPSPFLLGHLPVNKGKILGLSCVVCVCGDTSSGKHYGILACNGCSG  
FFKRSVRRKLIYRCQAGTGRCVVDKAHRNQCACRLKCLQMGMNKDAVQNERQPRNTATIRPEALVEMDQERALREA  
AVAVGVFGVHIFLLKGSQSTKDKSINRDKSNHISISGRSVPPVSLAVGFSPVRYPSLTSPSEVNSSKQEADEEDSIDVTNEES  
LPPTPTSRTLPTCTISTPTTHLPPPLYTTTQETIYETSARLLFMVAVKWNLPFASLPRDQVILLEECSWSELFLNNAIQWCLP  
VESSPLFSVNEHAATVPNGKSSQTAADIRVLNDMLLRYKAVGVDPAEFACLKAIVLFKSETRGLKDPLQVENLQDQAQVML  
GQHARGQHPTQPARFGRLLMIPLLKHVPTQRVEHIFQRTIGNTPMKVLCDMYKN\*

>Phumsvp

MALVAPPPTAWREPGAMLGPGPIGPGPGPVPTPTQAEDITALVPVVRELQQSATPGLQSNSTQSGGSNNGVDKNQ  
NIECVVCGDKSSGKHYGQFTCEGCKSFFKRSVRRNLTYSCRGNRNCPIDQHHRNQCQYCRLLKCLKMGMRREAVQRGRV  
PPSQPPGLPGLPDHRFIDRSIGHLLTRGQTLTISKIMDACGLSDVAHIESLQEKESQCALEEYCRTQYPNQPTRFGKLLLRPLSLR  
TVSSQVIEQLFFVRLVGKTPLETIRDMLLSGSSFSWPYMSSM

>Phumea

MWTYFFFFNFQTMKICDAISFFGRTYNNLGSITECKNNGECVINKKNRTACKACRLRKCLLVGMSKSGSRYGRRSNWFKI  
HCLLQEQSQNGTNRNLNTNIFGSPGFFPGSFLSNLLSPDKFFQTAAAFHGYSSRSKKEEVSNHSESGESSAGDVDDDESRS  
ALNNYMRPPSSHKTSPFSDKDYTRNSAFSKHLSPTPAVSLNLPTSPIGCTVNSPFSPVTTGGGMFFPPSQSPNRLFP  
SVVTKPGVVTINPLLSWPPSMQNGGNLLCSPALAGVAVEQEHPIDLSVKTSTISYNSPPTVSNKSDSDNYKENSVDV  
DDDDDDLTIDVELCKESVLKNNPLDLTAKRVEVPQSG

>ClecKnr1

MNQLCRVCGEPAAGFHFGAFTCEGCKSFFGRTYNNLSSISECKNNGECVINKKNRTSCKACRLRKCLLVGMSKSGSRYGRR  
SNWFKIHCLLQEQSGGAPTPPKWDEDNNNVKKEPPVWRLPIPGGPIFGFPPPIPPFLPRGLLPPPPPTPPQPPAPAS  
SLDILRSLGPVQDSPMDLRLRKDEESTQSDRKTPLDLTCKVT

>ClecHR6

MDNEERRSHEKFCVCGDQALGYNFNAVTCESCKAFFRRNATKTRELQCPFKQCCDITAVTRRFCQKCRKAKCFRVGMKR  
ELIMTEADKERKKRILANKARMVTAKAKDSIGNSKSVQVSMVSVIEGTQTEPLTCNCRQRYKADVPNSLLMAALPPPDKT  
QITYQLIKSIPTATLFPMSCQDNELLEDLIVANKALEAPLQELNLPDQDEFKVCAFILYSCGSKSLLDVINLTALAIRRLIKMCK  
RIGGFALCQEDQLTLLKQGCTQMMLLSVVTFDPRNSWRIPHVSVDQMSQINVEVLKEARGNLYDAHEAFLRTFDTRAS  
HDLNIMCILTAVLFDPNRTNLVKNQLIAQQQPDIILLRQISCYFQSRYSLLQCYLQSIYSSEESNEIYQHILICKMTELHQIIEH  
VRVYLVNPNPSQVEPILIEIFDLKTH\*

>ClecEcR

MWVRGYAMREEGCDQVTSSCPGVDDLELWDLGLGPGPRGIQLSEHRGDISGREDLSPNSLNGYSADSCDGSKKKKGT  
AVRQQEELCLVCGDRASGYHYNALTCEGCKGFFRRSITKNNVYQCKYGNCEIDMYMRRKQCERLKKCLSVGMRPECV  
VPEYQCAVKRKEKKAQKDKDKPVSTTNGSPEAIKVEPEPHRVSYTSSLFQSMIKESQTQSTEGELAKVAVNGIKQVSAEQEE  
LIHRLVYFQNEYEHPSDEDVRRINTPNDDEEQSDLKFRHITQITILTVQLIVEFAKRLPGFDKLLREDQIALLKACSSEVMMLR  
MARRYDAQSDSILFANNQPYTRDSYNMAGMGDVVEGLLRFCRQMYNMKVDNAEYALLTAIVIFSERPSLTEGWKVEKIQ  
EIYLEALKSYVDNRARPRSPITFAKLLSVLTELRTLGNQNSEMCFSLKQLQRKLPFLAEIWDVNP

>ClecHR39

MEGGVSVKWGEPTTRTGVTTSQVTVTTINIIHSPHDKEENYYQPQCNGGSSKCSVVVSQEVMNVEDSSAADAIEVCN  
FTSEPVNLRNKNRDESRGSIERPMSEWEGELSDSEVTTIKPEEENPIENSESGSNPKSSKIMAEDEKPIITLKNKITESAKTN  
QFNAQSELPLLVDKLSSGGVLKGPPTPSPDSAVYSCYSPTASPVTSRHILSSSGISSPFTPSLRNNSDASQYGGSQHSSC  
YSHSYSSVSVSPTQFSPTHSPIQGRHMHRPGFSPVLNPRGVHEYSMQDEGGTLDDKYSSMTADLLQHSTGLASPGISRQ  
QLINSPCICGDKISGFHYGIFSCESCCKGFFKRTVQNRKNYVCLRGSSCPVSIATRKKCPACRFDKCLNMGMKLEAIREDRTR  
GGRSTYQCSYTVPAGLVEQKCAEPPPQATPQTNLVPPLLQEIEMEVEHLWQYNEADPKLVGRIPRQSGNPTDLMANLCNI  
ADHRLYKIVKWCKSLPLFKNISIDDQTSLLINAWCELLLSCCFRSMSSPGEIRVSLGKICSLTEAKNLGLGPPPIERMLNFTEHLR  
RLRVDRYEVAMKVIVLLSSDTSDLREPEKVRASQEALQALQHYTLAHYPDIPSKFGELLRIPDLQRTCQVGKEMLSIKSE  
GEGPSFNLLMELLRGDH

>ClecHNF4

MFVRDVEDGEMGEGSLVGGNTVPVNFPOSCAICGDRATGKHYGASSCDGCKGFFRRSVRKNHLYNCRFSRTCVDKDK  
RNQCRYCRLRCKCFKAGMKKEAVQNERDRISCRNNSYDDQTIGNSLSVNSLLNAEILSRQTGAALEMSHDYDLSNKQVATIN  
DVCESMKQQLLFLVEWAKFIPAFLELQDDQVALLRAHAGEHLLGLARRSLHLKNVLLGNCCIIPRHTADAGGTADLDIS  
RVGTRVMDLVRPLTEVQIDDTEFACLKAIVFFDPNAKGLTESGKVKFLRYQIQINLEDYISDRQYDSRGRFGEILLTLPALQSI  
TSQMIEQIQFAKLVGAKIDSLLQEMILLGGAPDVPAANGQTNSTPMNIVNYPSSGGSPESQNGLSPVHSPQGSNTVLRDI  
STSTQDYQYSFKQEPGLDV\*

>ClectII

MDSRTKNHVNDRDDNAGRILYDIPCKVCQDHSSGKHYGIFACDGCAGFFKRSIRRNRYVCKVKGEGGCLVDKTHRNQC  
RACRLTKCLEAGMNRDAVQHERGPRNSTLRRQMCLLVKEEAGPSTPSMDLSAPNASPPHFSFYTPQIGEVLSNPEAICES  
AARLLFMNVRWAKNVPFTGLNMKDQTTLLEESWRELFLLGWAQLPLTDLAILVANSRLLQEAATFQDTLAKLRSLGLD  
HHEFACLRAVILFKTALEGEKSLVDVASIAALQDQQTQVTLNKYVSTAYPDQPYRFGKLLLLLPSLRLVSANTIEEMFFRRTIGP  
IPIERIICDMYRSAGAI\*

>Clecusp

LSLENNLALVGPQSPLDMPDASLLVGGFSPTGGTSGSTPTTFNIGHSSVLGNGNKSTVVYPPNHPLSGSKHLCSICGDR  
ASGKHYGVYSECGCKGFFKRTVRKDLSYACREDKQCLVDKKQRNRCYCRYQKCLSMGMKREAVQEERQRTKDRDQNE  
VESTSSFHTDMPVERILEAERRVDCKIETPPIDFENQTEICQATDKQLFQLVDWAKHIPHFTSLPLEDQILLNAGWNELLIA  
GFHSRVSITRDGLVLGSGVTINRNNAHQAGMGTYDRVTELIKMKREMKMDKTELGLRTIILYNPEVRGLKSVQDVEML  
REKVYAALEEYSRMSHPDEPGRFAKLLRLPSLSIGLKCQEHLFFYRAIGDVSVDTFLLQMLESPERL\*

>ClecHR38

MKATRPNIITSKQNKARIGGSSSDSPKLRQGTTPCPSASVSSSASSSPTERPNAISPSQLCAVCGDTAACQHYGVRTCEGC  
KGGFFKRTVQKGSKYVCLAEKSCPVDKRRRNRCQFCRFQKCLSVGMVKEVVRTDSLKGRRGRLPSKPKSPQESPPSPVSLIT  
ALVRAHLDTSPDISNLDYSQYREPNEEDVQMSETEKTQQFYNLLTSSVDVIRHFAEKIPGFSELCREDDQLLQFQASLELFLR  
LAYRSRVVDMKMTFCNGVVLSRNQCQRSLGDWLHPILEFCQSLHAMEIDISSFACLALTLITVSMNLNY\*

>ClecPNR

MLSMQEEGKEAYCKVCGDKASGKHYGVASCDGCRGFFKRSIRRNLDYVCKEEGRVVDVTRRNQCQACRFSKCLRVNMK  
KDAVQHERSPRSNSATPSLSFVYQQFLPYPRAYLHPASIPGLQYMGCYMRSECNENEVSSSQESTESRLEPSVLSLSEDIYSTS  
SRLLSLTVQCVRAIPSFQQLSPQDRDLSLEDSWKDLFILTLAQWVTYLAPIQFLSGFFVLFMTFIISLLVLEKLRDGTGIDDASR  
LDELKDKLVVSYAIARLTQLRADHTEFACLKALVLFNPESVRKEEVEVLQEQTHVMMLAEYSGVRSAKLLLLLNTSRTSLKNIL  
LLFFNRHAPVRLEGLLASK\*

>ClecHR4

GLSPECGGRKGGEVVKEELVFDGGGPAPATSGSGYWPPQQQQQQPQQHQAQQQNPRVNGVRHELIGNEMRPPQ  
APTTPRPAPTVLMGEVGGVVRTMVWSQPAPAEQPTTSSWPPPNQEETAQLLLLTLGQETSPNTTGTALNMRWLWAGDLS  
QLPGAQQITALNLSWAKQQPTKPDHEDDEQPMICMICEDKATGLHYGIITCEGCKGFFKRTVQNRVYTCVADGVCEIT  
KAQRNRCQYCRFKKICIEQGMVLQAVREDRMPGGRNSGAVYNLYKVYKHKHKSVRNGQIKSVNEKGKPAISPEHSIPHL  
VNGTILKTALTNPSEFMCTMVVHLRQLDNAVSSSRDWALPIDATLSMIQTLIDCDEFQDIATLRNDDLLEHKSDLSDKLM  
QIGDSIVYKLVQWTKRPLPFYELPVEVHTRLLTHKWHELLVLTTSAYQAIHGAHKLASTGSDGTEAHFTQEVSNLCTLQTC  
TSMMPGRPITMDQLRQDVGLMVEKITHVTLMFRIKLTMQEYVCLKVIIMLNPARGGSELEAIQERYMTCLRTYVEHNSP  
NNPNRFHDLVRLPEVQSAASLLESKMFYVFPFLNNTIQRX

>ClecKnrI3

MPKENEKKKERKRERERKQFTFFNYVHKSXSVDQRARNYTTAKLDEPRMNQQCKVCNEPAAGFHFGAFTCEGCKSFFGRT  
YNNLSSISECKNNGECVINKNRTSCKACRLRKCCLLVGMSKSGSRYGRRSNWFKIHCLLQEQGGLPAVKKEDEEEEAQKERR  
FTPPPPFYPPQRRHFLFPQEPWQPWPPTPEAPQDQPIDLSLKPRTDSEVLDTLTKRQALAGWSS\*

>ClecKnrI2

MNQQCKVCGEPAAGFHFGAFTCEGSILATRIEFFRLAYKRKGVVCLKFTFPQFLGLLIPRARVFPVRPCATPQLAKSVLDLDV  
VIQLPSFLFQSFGRSYNNLSSISECKNNGECVINKNRTSCKACRLRKCCLLVGMSKSGSRYGRRSNWFKIHCLLQEQKQKND  
DGRLGAQIASINRKEELMLLGLLEDYKTYSPSTSSPGSDTSEEKCRREPPYFGFPIIPQMFLPQPFPHPAFLPSPYLYQNRTWD  
ESPIDLSTKSAEDSTDSDEDINVDDLPEEPSIIRAPLDLTTKV

>ClecHR3

MVKHPSGTYNRRNDSTPLECPGCDPSLLEYAFPNSQWSASRGTVKGRTPVATPRSHPAAAVPSLEQSVGGVIGVISWVR  
RRQKLVKMAKCRRNAQAQIEIIPCKVCGDKSSGVHYGVITCEGCKGFFRRSQSSVVNYQCPRSKACLVDNRNRNRCQYCR  
QKCLRLGMSRDAVKFGRMSKKQREKVEDEVRYHRAQLRAQVEQTPDSSVFDQAQTPSSTDQLHNYTGYSAYGSDVGSYS  
YNYTGQVTATMQYDISADFVDSTTTAYDPRPSIDQMSSESMMSANNVSTGGGVGKVVQGGQRLAIKLESEPIDSDIVNTF  
VDSTTSRQSEDVSPKESESNSNSYSSLIDPAQISELLSKTIADAHARTCLYSIEHIHNMFRKPQDLSKLIFYKNMAHEELWLEC

AQKLTTVIQIIIEFAKMVPGFMKLSQDDQIVLLKAGSFELAILRMSRYFDLSSGWVLYGDTMLPQDAFYTTDAEMKLVTL  
AFEVSSGVAELKLTETELALYSACVLLSADRPLGLKGLAEIGRLGQAVLRALRIELERNHTTPIKGDVTVCDALLAKIPTLRELSML  
HMEALGKFKRSTPHLEFPALHKELFSVDS\*

>Clecdfs

MVLIDPFVQGDRLDIPCKVCGDRSSGKHYIYSCDGCSGFFKRSIHRNRVYTCKAQGDGKGRCPIDKTHRNQCACRLTKC  
FQSAMNKDGMGGTIAVQHERGPRKPKQSKDGESPVQRQVSGNNGVCLESSQHSPLKLTSPAYQQAPMQQADSPERRPQ  
PLFVSHQPPGLLQLLMSAEKQEIWVWNGKLDVINGGNSGPGSPSATAIPLSLSPSWEVLQGSICSQETTARLLFMAVRWVR  
CLAPFQTLSKRDQFLAVNLTSMCIYLQLLLLQESWKELFLLHLAQWSPWDLSPVLGGPKARERLPLDDTLVPNELNAIQEIL  
ARFRQLSPDGSECGCMKAVILFTPETPGLVDVQPVEMLQDQAQCILNDYVRGRYARQPTRFRGRLMIPGLKVIHQSTIERL  
FFRETIGDIPIHRLGDMYVMEKSYS\*

>ClecE75B

MLFDTRVPQYHGQYFAPGLPPQLPEAQPPQADHQLNIEFDGTTVLCRVCBGDKASGFHYGVHSCGCKMGCLCDQGFFR  
RSIQQKIQYRPTKNQQCAILRINRNCQYCRLLKCAVGMRSRDEQFEPTRTHCFTNVSLDFPKRVDNNTKDFQPPFNK  
KRPVMMTEELPILKILNGVNYHNAPVRFGRVPKREKARILAAMQQSTNSKCEKALAAEEDDQRLLRVIRAHLDTC  
FTRDKVEPMILRAREQPSFTASPPTLACPLNPNPQPLTGQQELLQDFSKRFSPAIRGVVEFAKRIPGFGILSQDDQVTLKAG  
VFEVLLVRLACMFDTQNNSMICLNGQVLKRESIHSGSNARFLMDSMFDFAERLNSRLTDAEIGLSSIVVIAPDRPGLRNTE  
LIERMQNKLKAGLQLMMSQNHNPQCLAQELMKKIPDLRTLNLHSEKLLAFKMTEQQHLAEQQQMWTGTVSEDESKS  
PSGSTWSSSDVAMEEVKSPGLSVSSTESMCSGEVEYHSSHAASAPPLAATLAGGCPMRHRVGVEDNKDIIHRTFRKL  
DPSDSGIESGTEKVDKLTSSAPTSLCSRSSVEDKEDHQIEDMPVLKRVLQAPPLYDTNSLMDEAYKPHKKFRALRKECGD  
EPDNTTSSLSSTHSTLAKSLMEGPRMTAEQMKRTDIIHNYIMRGEQCGWQQQSVITSSAARGGAYVIVNNSPPGPSI  
YVPAGSPCPSSTSLVELQVGTQPLNLSKKTPPSPRPKVLSELA

>Clecsvp

MEMIDDKCVLREHDKLLKYSVGGVLCGGGASSGAPPYHHVPPPEFPRAIVPWRDPSLVTLTQEDTLVSQAIRGDTPTGNS  
TQSGGSQADKNQNICIVCGDKSSGKHYGQFTCEEEKLTPDEFYLIKLRITIKMLLCFGFAAVQRGRVPPSQPPSLPGQFALT  
NGDAMSAAAAAAAAAAGFNHSHYLSYISLLRAEPYPTSRYGQCMQPNMIGIDNICELARLLFSAVEWARNIPFFPD  
QVTDQVALLRLVWSELVFNASQCSMPLHVAPLLAAAGLHASPMAADRVAFMDFHIFQEQVEKLLALHVDSEAYSC  
AIDMKKLDISSERVPSILLESVLVKVSMTVSAHGPAKRGDACLSDVAHIESLQEKSQCALEEYCRTQYPNQPTRFGKLL  
RLPSLRTVSSQVIEQLFFVRLVGKTIETLIRDMLLSGNNFNWPTYMX

>ClecFtz

MGDDDMTVSLPTSSAQETNSEIEQINTHDTETEELQVSFDNNTGTGVMGELPAGGASSFQQQPQMLQQAVSDMPDT  
KEGIEELCPVCGDKVSGYHYGLLTCESCKGFFKRTVQNKVYTCVAERSCHIDKTQRKRCPCFRFQKCLEVGMKLEAVRADR  
MRGGRNKFPGMYKRDRARKLQMMRQRQLAAQTLRNSSGYSPPGLGDAVTLQYQPGSNFASLHIKQEIQIPQVSSLTSSPE  
SSPSPIAVALGQAANGNISNNMCSVMPSGQTQPALQVNDQRISHQSVQAFEHAKLWSGNTSPPPSKTFQYEGSSSQS  
QSKVSPMIRDFVQAIDDHEWQNSLYNLLQNQTYNQCEVDLFEMLCKVLDQNLFSQVDWARNSVFFKDLKVDQMKLLQ  
HSWSDMLVLDHMHQRMHNSLPDETTLPNGQKFDLLSLGLLGVPSLSEPFTEITKLQDLKFDLSDYICIKLLLLNPEVRGL  
MNRKHVQEGHEVQVQSLHDYCLTTPVQVQDKFNKLLQILPEIHLRATTGEEHLVVKHCNGSAPTQTLLEMLHAKRK

>ClecHR51

MTTRWRVEDYSSRWNCGPQTVVRATRSPPPPQLGGGKLSLGLSCVCGDTSSGKHYGILACNGCSGFFKRSVRRKLIYR  
SSMSLGLSMQYKNMISANASPGQEEINAVQPRSQYSQSPPKSSRDENEDEDIDVTNEEPPATGTYSMSASAPPLPEY  
VFYPTMPETVYEVAAARLLMGVKWAKNLPFASLPRDQVILLEECAELFLNAIHWCLPLETCKLFSVPEHVMAAPSGKE  
GLVAHEVRALNDALQKFAIRVDAGEFACLKAIVLFKSETRGLKDPMQVENFQDQAQVMLCQHSRTNHPDQGRFRGRL  
LMLPLLKVVPTNRIEDIFFQPTIGNTPMEKVLCDMYKG\*

>ClecHR78

MEKHAESSGIMNANSDKIHSLCLGVEICVCGDRASGRHYGAISCEGCKGFFKRSIRKRLGYQCRGNQQCEVTKHHRNRC  
QYCRQLKCLTMGMRTVQHERKPIVSKKEFPNHSSPFYKSLTQPSNIGQSNGYVYNSLPYNLYSDGYIKQESSNIIIGNYDYSNY  
DESSDSDLIESIGPGQDSKSMINSAMEIATKLGMMNGNFGNSDDEEMENLQFDGRLLDDNAFIFQIQSPSPMPAYTDVHIY  
ESASRLLFLSVHWVRNVPFAFQILNMDTQVSLIKGCWSELFTLGLSQAQVLAALPTIILSIINHLQSSVAQQKISSKVKAVTEHI  
FSLQDFVGSMAVALNVDDEHYAYLKLIALFSPDNPSLHIRRQLSELQEAFQELREQIGDVNSNRFARLLRLPLRALNRHIM  
EQIFFPGLGDQCDIDNIIPFILKMESIDFVNEQNN

>ClecE78C

MSRDSVRYGRVPKRSRERSGGEERVSTSDSSSGATPPDPETTSTPAYDLIVLEQQRIWLWQQFATHITPSVQRVVEFAKRV  
PGFCELSQDDQLILIKVGFELWLSHAARLTDTTTFSDGTFVTRQQMELMYDVSPTQSEFVTSMFEEFTSSFNLLGDTEL  
GLFSSIVLLSPDRPGVTDVKAVEHHQDRRSTNGTSSSVLAKLPELRALGAKHALMLEWFRLNWDKLRPLPLFAEIFDIPKSE  
EDL

>Ph460980-HR96

MNSRASSRELNDAERAKLNELIVANKALLAPLEDDLSGDDFGFNVNAMAGCGPSVLVDVLNLTAVAIRRLIKMSKKINAFK  
NMCQDDQIALLKGGCTEMMILRSAMTYDPDRDSWKIPQSKEKLMNIKVDILKEAGGRVFEHQRFQTFDQKWRNDENI  
MLILSAIALFTPDRPRVVHFDVIKLEQNSYYYLLRRYLESVYQGCEARLTLKLIHKISELHKLNEDHVRVYLDANPREIEPLIEIF  
DLKPH\*
